# Supplementary material
Source: PubMed Central journal article supplement (PMC4939618)
Supplement: NIHMS796789-supplement-supplement_1.pdf [file NIHMS796789-supplement-supplement_1.pdf]

Supplementary Materials for  
**Laminopathies disrupt epigenomic developmental programs and cell fate**

Jelena Perovanovic, Stefania Dell'Orso, Viola F. Gnoch, Jyoti K. Jaiswal, Vittorio Sartorelli, Corinne Vigouroux, Kamel Mamchaoui, Vincent Mouly, Gisèle Bonne, Eric P. Hoffman\*

\*Corresponding author. E-mail: ehoffman@binghamton.edu

Published 20 April 2016, *Sci. Transl. Med.* **8**, 335ra58 (2016)  
DOI: 10.1126/scitranslmed.aad4991

**The PDF file includes:**

- Fig. S1. Transfection of DamLMNA constructs into HEK293T cells.
- Fig. S2. LADs show enrichment for heterochromatin and are negatively correlated with euchromatin.
- Fig. S3. Myogenin locus localized closer to the nuclear periphery in EDMD myotubes.
- Fig. S4. Myogenic in vitro differentiation of MyoD-converted EDMD patient fibroblasts (p.H222P LMNA) into myoblasts.
- Fig. S5. DNA methylation analysis of lamin A/C [wild-type, EDMD (LMNA p.R453W), and FPLD (LMNA p.R482W)] transduced human skeletal myogenic cells.
- Fig. S6. Genome-wide analysis of H3K9me3 peaks in wild-type and emerin-null (emd) differentiating mouse myoblasts shows similar peak distributions.
- Fig. S7. Sox2 protein levels show abnormal up-regulation in emerin-null murine cells and EDMD patients harboring LMNA p.H222P mutation.
- Fig. S8. EDMD LMNA mutation significantly inhibits myogenin expression in human myogenic cells infected with LMNA constructs.
- Table S1. Genome-wide DamID-seq analysis of three lamin A proteins (wild-type, p.R453W LMNA causing EDMD, and p.R482W LMNA causing FPLD).
- Table S2. Genes showing mRNA induction at myoblast-myotube transition (ENCODE).
- Table S3. DNA methylation data of normal and EDMD patient MyoD-converted myoblasts normalized to d1.

Table S4. Human myogenic cells infected with EDMD LMNA variant show differential DNA methylation levels on myogenic and cell cycle genes.

Table S5. Heterochromatin peaks (H3K9me3) showing decreased enrichment in emerin-null cell during myogenic transition (d0 to d1).

Table S6. Characteristics of the patient muscle biopsies used for mRNA profiling.

Table S7. ChIP-seq targets show up-regulation in muscle biopsies from EDMD patients.

Table S8. Primer sequences used for qRT-PCR and ChIP-qPCR experiments.

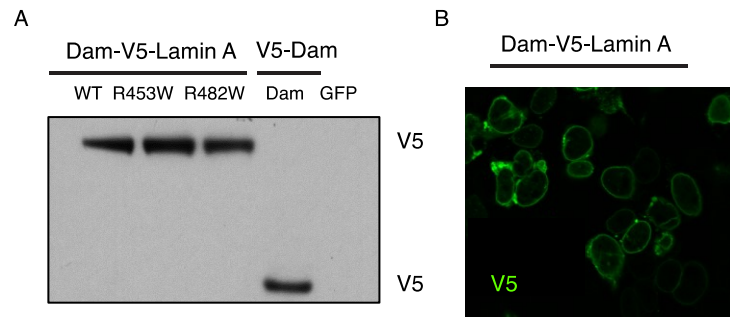

**Fig. S1. Transfection of DamLMNA constructs into HEK293T cells.** Panel A: Western blot shows using antibody against V5 shows the product size corresponding to the fusion (Dam-V5-LMNA) and V5-Dam alone proteins. Panel B: Immunofluorescence analysis confirms that fusion protein localizes to the nuclear envelope.

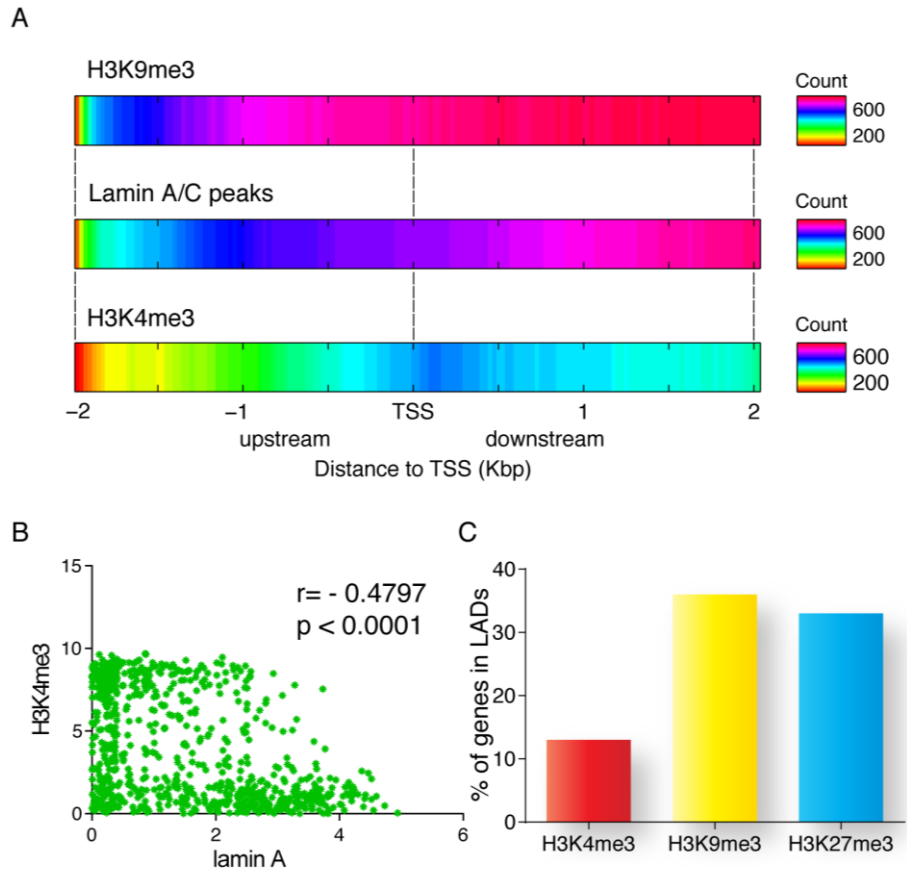

**Fig. S2. LADs show enrichment for heterochromatin and are negatively correlated with euchromatin.** Panel A: Distribution of H3K9me3 (top), lamin A (middle) and H3K4me3 (bottom) peaks around of transcription start site (2Kb +/-). Panel B: Scatter plot showing negative correlation between lamin A and H3K4me3 peaks. Panel C: Percentage of LAD genes that show enrichment for other chromatin marks (H3K4me3, H3K9me3, H3K27me3).

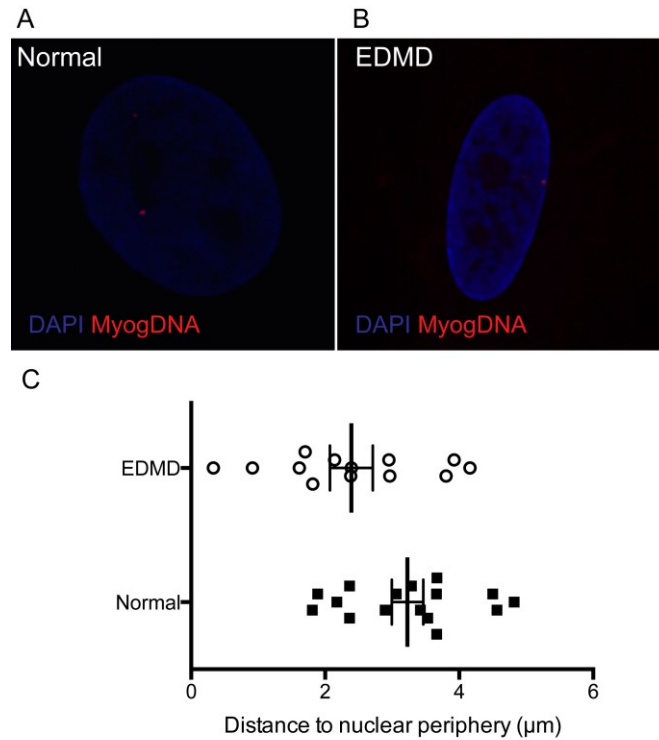

**Fig. S3. Myogenin locus localized closer to the nuclear periphery in EDMD myotubes.** FISH analysis showed that myogenin probe is abnormally localized peripherally in EDMD patient cells harboring LMNA p.H222P mutation (Panel B) relative to Normal control (Panel A). Panel C: Quantification analysis showing distribution of myogenin signal relative to nuclear periphery (Normal: n=16 nuclei; EDMD n= 13 nuclei; p value= 0.054).

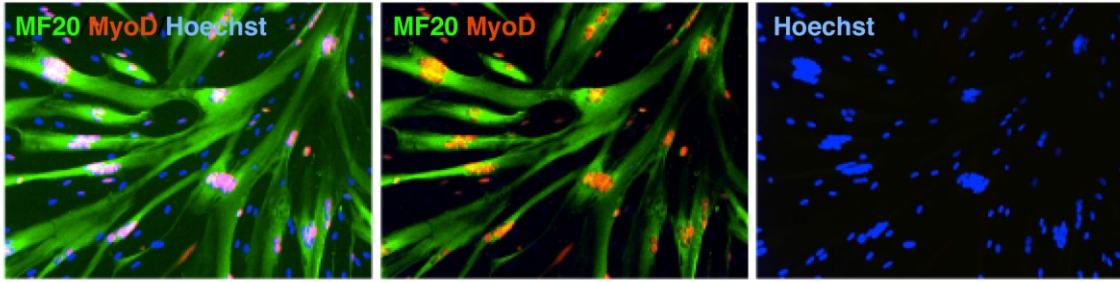

**Fig. S4. Myogenic in vitro differentiation of MyoD-converted EDMD patient fibroblasts (p.H222P LMNA) into myoblasts.** Immunostaining of EDMD patient fibroblasts show successful conversion into myogenic lineage capable of forming myotubes. Cells were stained for myogenic marker (myosin –MF20), MyoD and Hoechst (nuclear marker).



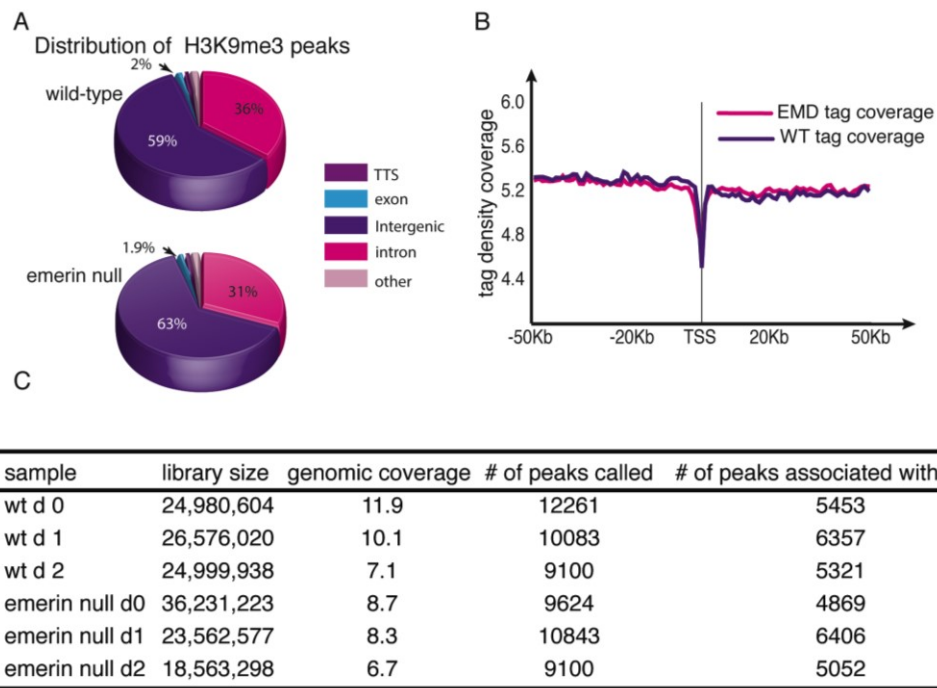

**Fig. S6. Genome-wide analysis of H3K9me3 peaks in wild-type and emerin-null (emd) differentiating mouse myoblasts shows similar peak distributions.** Panel A: Distribution of H3K9me3 peaks in wild-type and emerin null myogenic cells. Panel B: Sequence tag density coverage shows similar profiles for H3K9me3 in wild-type and emerin null cells. Heterochromatin enrichment shows drop in tag density in both cell types. Panel C: Properties of heterochromatic domains in wild-type and emerin null cells during differentiation are shown in the table.



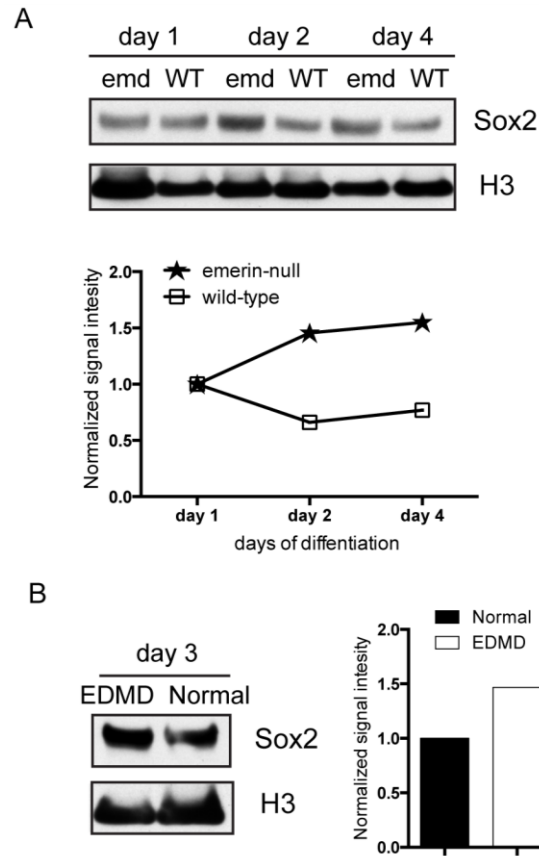

**Fig. S7. Sox2 protein levels show abnormal up-regulation in emerin-null murine cells and EDMD patients harboring LMNA p.H222P mutation.** Panel A: Wild-type and emerin null H2K cells were differentiated for 24 hrs (day 1), 48 hrs (day 2) and 96 hrs (day 4). Sox2 protein levels were queried using western blot analysis. Sox2 levels were normalized to loading control (H3) levels and day 1 for each condition to show changes in Sox2 expression over the course of differentiation. Panel B: Normal and EDMD MyoD converted myoblasts were harvested after 72 hrs (day 3) post differentiation. Sox2 protein levels were normalized to loading control (H3).

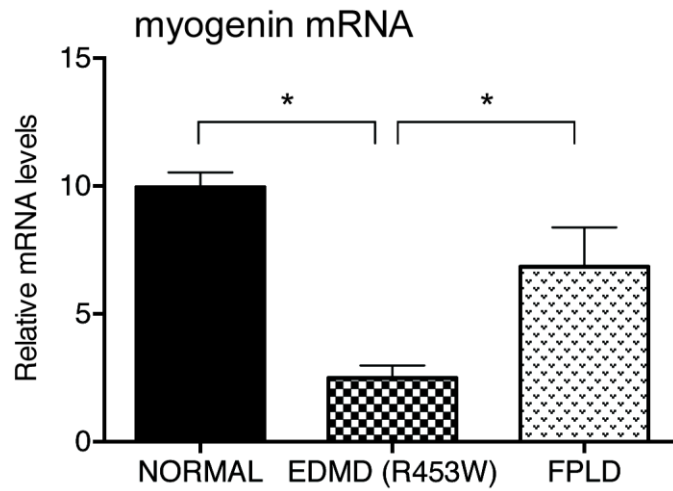

**Fig S8. EDMD LMNA mutation significantly inhibits myogenin expression in human myogenic cells infected with LMNA constructs.** Human skeletal myoblasts were infected with lentiviral vectors carrying 3 different LMNA mutations (WT, p.R453W [EDMD], p.R482W [FPLD]) and differentiated into myotubes. Myogenin mRNA levels were compared using qRT-PCR (\*  $p < 0.05$ , Student t test).

**Table S1. Genome-wide DamID-seq analysis of three lamin A proteins (wild-type, p.R453W LMNA causing EDMD, and p.R482W LMNA causing FPLD).** Properties of lamina-associated domains are shown in the table.

|              | LADs                |               |                |                |                   |                 | Non-LAD genome coverage (%) |
|--------------|---------------------|---------------|----------------|----------------|-------------------|-----------------|-----------------------------|
|              | Genome coverage (%) | Number        | Min size (kbp) | Max size (kbp) | Median size (kbp) | Mean size (kbp) |                             |
| DamLMNA      | 12.04               | <b>11,607</b> | 2              | 1070           | 26                | <b>32.5</b>     | 87.96                       |
| DamLMNA-EDMD | 13.88               | <b>19,502</b> | 2              | 245            | 17.9              | <b>22.3</b>     | 86.12                       |
| DamLMNA-FPLD | 14.6                | <b>22,947</b> | 2              | 194            | 15.9              | <b>19.9</b>     | 85.4                        |

**Table S2. Genes showing mRNA induction at myoblasts-myotube transition (ENCODE).**

Gene names, fold change and p values (FDR corrected) are shown in the table. Genes are ranked by p value.

| Gene ID | Fold change | p value |
|---------|-------------|---------|
| DCLK2   | 3.60        | 7.7E-06 |
| PARM1   | 4.55        | 5.5E-05 |
| TRIM54  | 4.53        | 8.2E-05 |
| KCNA10  | 1.58        | 1.1E-04 |
| HSPA12A | 2.48        | 1.6E-04 |
| ATXN1   | 2.10        | 2.0E-04 |
| ATP1B4  | 66.71       | 2.0E-04 |
| GPNMB   | 13.88       | 2.0E-04 |
| RALGPS1 | 1.77        | 2.2E-04 |
| DHCR24  | 2.39        | 2.4E-04 |
| NBEA    | 4.10        | 2.5E-04 |
| PDE7A   | 3.04        | 2.6E-04 |
| ARMC9   | 2.76        | 2.7E-04 |
| HDAC9   | 9.48        | 2.8E-04 |
| MYOM1   | 24.49       | 2.8E-04 |
| KBTBD5  | 3.05        | 3.2E-04 |
| LRRC39  | 20.69       | 3.4E-04 |
| CPEB4   | 3.51        | 3.5E-04 |
| PLD1    | 2.61        | 3.5E-04 |
| PRKCQ   | 4.12        | 3.8E-04 |
| SGCD    | 2.19        | 4.4E-04 |
| ABCG2   | 1.73        | 5.4E-04 |
| ENAM    | 1.34        | 5.7E-04 |
| SAMD4A  | 1.90        | 5.7E-04 |
| TNNC2   | 7.63        | 5.8E-04 |
| CAP2    | 2.41        | 6.0E-04 |

|               |       |         |
|---------------|-------|---------|
| DIP2B         | 1.59  | 6.2E-04 |
| TRIM63        | 2.88  | 6.3E-04 |
| MYH6          | 2.81  | 6.5E-04 |
| POLB          | 2.61  | 6.6E-04 |
| ANKRD36BP1    | 1.41  | 7.0E-04 |
| ASB14         | 7.24  | 7.2E-04 |
| NEO1          | 2.25  | 7.4E-04 |
| C10orf71      | 2.19  | 7.5E-04 |
| FBXO30        | 2.00  | 7.5E-04 |
| TNIK          | 2.85  | 7.7E-04 |
| SOHLH2        | 16.67 | 7.8E-04 |
| KIF2A         | 1.72  | 7.8E-04 |
| MYOM2         | 11.89 | 8.0E-04 |
| FRMPD1        | 2.65  | 8.0E-04 |
| GRAMD3        | 2.83  | 8.0E-04 |
| C7orf41       | 3.04  | 8.1E-04 |
| LITAF         | 3.87  | 8.6E-04 |
| POPDC2        | 3.26  | 8.8E-04 |
| SULF2         | 1.42  | 8.9E-04 |
| COLQ          | 2.00  | 8.9E-04 |
| PGAP1         | 1.84  | 9.1E-04 |
| MACROD2       | 1.93  | 9.6E-04 |
| DENND1B       | 2.00  | 9.7E-04 |
| PLN           | 8.32  | 9.8E-04 |
| SRPK3         | 1.79  | 1.0E-03 |
| RBM24         | 2.33  | 1.0E-03 |
| EGF           | 7.14  | 1.1E-03 |
| GSK3B         | 1.30  | 1.1E-03 |
| ZNF148        | 1.59  | 1.3E-03 |
| CPEB3         | 2.68  | 1.3E-03 |
| GPR98         | 1.89  | 1.3E-03 |
| P2RX5-TAX1BP3 | 2.27  | 1.3E-03 |
| C12orf42      | 2.47  | 1.4E-03 |
| SLCO2B1       | 1.31  | 1.4E-03 |
| ICOSLG        | 2.56  | 1.4E-03 |
| LDB3          | 5.27  | 1.4E-03 |
| SPATA13       | 1.50  | 1.5E-03 |
| TMEM229B      | 1.39  | 1.6E-03 |
| SLC15A2       | 3.58  | 1.6E-03 |
| LDLR          | 2.91  | 1.6E-03 |
| ITGA6         | 2.47  | 1.6E-03 |
| SGCG          | 27.31 | 1.6E-03 |
| GGA2          | 1.69  | 1.6E-03 |
| CACNA2D1      | 7.32  | 1.6E-03 |
| HUNK          | 3.38  | 1.7E-03 |
| ZNF643        | 1.51  | 1.7E-03 |
| HMBOX1        | 2.88  | 1.8E-03 |
| KCNN3         | 2.87  | 1.8E-03 |
| PLP1          | 3.58  | 1.8E-03 |
| DPYSL5        | 5.94  | 1.9E-03 |
| NAV3          | 2.76  | 1.9E-03 |
| CDKN1A        | 2.57  | 1.9E-03 |
| STK38L        | 2.65  | 1.9E-03 |
| CYSLTR1       | 14.35 | 2.0E-03 |
| LOC646513     | 1.57  | 2.0E-03 |
| BRF1          | 1.66  | 2.0E-03 |
| PKIA          | 2.85  | 2.0E-03 |
| C1orf105      | 4.42  | 2.1E-03 |
| SVIL          | 5.23  | 2.1E-03 |
| EXOC6         | 4.54  | 2.2E-03 |
| MXRA5         | 4.89  | 2.2E-03 |
| SEL1L3        | 3.07  | 2.2E-03 |

|           |       |         |
|-----------|-------|---------|
| PTPRB     | 2.05  | 2.3E-03 |
| RNF121    | 1.86  | 2.3E-03 |
| A2M       | 44.09 | 2.3E-03 |
| ELAVL2    | 3.54  | 2.3E-03 |
| LRP8      | 1.97  | 2.3E-03 |
| PKHD1     | 6.56  | 2.3E-03 |
| PPFIBP2   | 4.64  | 2.3E-03 |
| NIPSNAP3B | 2.49  | 2.4E-03 |
| LEPROTL1  | 1.47  | 2.4E-03 |
| ANKRD50   | 1.36  | 2.4E-03 |
| KIAA0922  | 1.83  | 2.4E-03 |
| SCD       | 4.77  | 2.5E-03 |
| REEP1     | 12.84 | 2.5E-03 |
| TMEM38B   | 6.53  | 2.5E-03 |
| FRK       | 3.38  | 2.5E-03 |
| CLCN6     | 1.63  | 2.6E-03 |
| ZNF323    | 2.80  | 2.7E-03 |
| PPP1R15A  | 1.31  | 2.7E-03 |
| AKNAD1    | 1.66  | 2.7E-03 |
| RNF19B    | 1.72  | 2.8E-03 |
| ZNF483    | 3.28  | 2.8E-03 |
| GNA14     | 1.26  | 2.9E-03 |
| SLC1A2    | 1.49  | 2.9E-03 |
| PSEN2     | 1.91  | 2.9E-03 |
| PLCXD2    | 1.40  | 2.9E-03 |
| RBFOX1    | 2.54  | 2.9E-03 |
| OLFML1    | 1.55  | 2.9E-03 |
| DCX       | 4.99  | 2.9E-03 |
| ZFP106    | 3.88  | 2.9E-03 |
| TGFB3     | 4.39  | 3.0E-03 |
| SYNPO2L   | 3.34  | 3.0E-03 |
| FSD1L     | 4.70  | 3.1E-03 |
| PRUNE     | 2.71  | 3.1E-03 |
| PIK3C2B   | 4.02  | 3.1E-03 |
| MYL1      | 28.66 | 3.1E-03 |
| BHLHE40   | 4.25  | 3.2E-03 |
| CXCL13    | 2.76  | 3.2E-03 |
| SLCO5A1   | 6.28  | 3.3E-03 |
| ATP1A1    | 1.88  | 3.3E-03 |
| MED12L    | 2.94  | 3.4E-03 |
| FBXO40    | 4.15  | 3.4E-03 |
| NFKB2     | 1.35  | 3.4E-03 |
| MOAP1     | 1.70  | 3.4E-03 |
| CDK18     | 3.23  | 3.5E-03 |
| CKMT2     | 8.76  | 3.5E-03 |
| RNF152    | 3.20  | 3.5E-03 |
| FADS2     | 6.23  | 3.5E-03 |
| INPP4B    | 2.24  | 3.5E-03 |
| TPRG1     | 3.21  | 3.7E-03 |
| TMEM62    | 2.14  | 3.7E-03 |
| NCF2      | 1.44  | 3.7E-03 |
| DENND1B   | 1.78  | 3.8E-03 |
| NECAB3    | 1.60  | 3.8E-03 |
| AIF1L     | 3.15  | 3.8E-03 |
| CHRM4     | 1.46  | 3.8E-03 |
| KCTD7     | 1.83  | 3.8E-03 |
| ASB4      | 3.13  | 3.9E-03 |
| SNX18     | 1.61  | 3.9E-03 |
| COL14A1   | 8.44  | 3.9E-03 |
| SLN       | 44.72 | 3.9E-03 |
| EGR2      | 2.48  | 3.9E-03 |
| ENO3      | 6.73  | 3.9E-03 |

|           |       |         |
|-----------|-------|---------|
| DCP2      | 2.35  | 3.9E-03 |
| DACT1     | 4.92  | 3.9E-03 |
| FAM213A   | 5.57  | 3.9E-03 |
| DNAJA4    | 5.48  | 4.0E-03 |
| CYP2J2    | 10.26 | 4.0E-03 |
| PPMIK     | 5.08  | 4.0E-03 |
| GRASP     | 2.16  | 4.0E-03 |
| TTC33     | 1.74  | 4.0E-03 |
| CLCN7     | 1.48  | 4.1E-03 |
| PRAP1     | 1.35  | 4.1E-03 |
| ERBB2     | 1.51  | 4.1E-03 |
| EFCAB7    | 1.49  | 4.2E-03 |
| HRC       | 5.34  | 4.3E-03 |
| EAF2      | 2.19  | 4.3E-03 |
| MGAT4A    | 1.49  | 4.4E-03 |
| PADI2     | 2.64  | 4.4E-03 |
| SHISA4    | 3.20  | 4.5E-03 |
| MEF2A     | 2.96  | 4.6E-03 |
| FGF13     | 1.90  | 4.6E-03 |
| TTC13     | 2.39  | 4.7E-03 |
| CSRP3     | 8.60  | 4.7E-03 |
| MAPK8     | 1.51  | 4.8E-03 |
| TSPAN9    | 2.81  | 4.8E-03 |
| RNF115    | 2.01  | 4.8E-03 |
| TOM1L2    | 1.53  | 4.8E-03 |
| TRO       | 1.95  | 4.8E-03 |
| MYOT      | 13.30 | 5.0E-03 |
| NUDT9     | 1.44  | 5.0E-03 |
| CDKN2B    | 1.88  | 5.0E-03 |
| PLXDC1    | 1.66  | 5.0E-03 |
| GXYLT2    | 1.64  | 5.1E-03 |
| CD36      | 26.14 | 5.2E-03 |
| FNDC5     | 3.02  | 5.2E-03 |
| PGM5      | 7.10  | 5.2E-03 |
| CCDC141   | 9.00  | 5.2E-03 |
| HMGCS1    | 4.33  | 5.2E-03 |
| MSMO1     | 3.80  | 5.2E-03 |
| LOC158696 | 3.04  | 5.3E-03 |
| FABP3     | 9.55  | 5.3E-03 |
| ZSCAN16   | 1.40  | 5.3E-03 |
| DYNC1H1   | 2.08  | 5.3E-03 |
| NEK7      | 2.02  | 5.4E-03 |
| ABLIM3    | 2.02  | 5.4E-03 |
| SCAI      | 1.76  | 5.5E-03 |
| MYOM3     | 9.03  | 5.5E-03 |
| MYL3      | 2.03  | 5.6E-03 |
| NEURL     | 1.62  | 5.6E-03 |
| VASH1     | 2.40  | 5.6E-03 |
| CDKL1     | 1.30  | 5.6E-03 |
| DNAJB6    | 1.62  | 5.6E-03 |
| ATP8A1    | 20.66 | 5.7E-03 |
| CXCL12    | 3.69  | 5.7E-03 |
| C16orf54  | 1.29  | 5.7E-03 |
| KIFAP3    | 1.70  | 5.7E-03 |
| GPRC5B    | 4.64  | 5.7E-03 |
| NUP50     | 3.54  | 5.7E-03 |
| OLFM2     | 2.44  | 5.7E-03 |
| GPRC5C    | 2.66  | 5.8E-03 |
| RRAGD     | 18.29 | 5.8E-03 |
| TPM3      | 6.15  | 5.8E-03 |
| AMZ2P1    | 1.23  | 5.8E-03 |
| UAP1L1    | 1.46  | 5.9E-03 |

|           |       |         |
|-----------|-------|---------|
| DPY19L2P4 | 1.42  | 5.9E-03 |
| HRASLS2   | 1.49  | 5.9E-03 |
| FAM189A2  | 2.34  | 6.0E-03 |
| C13orf44  | 1.79  | 6.0E-03 |
| AGL       | 4.18  | 6.0E-03 |
| SQSTM1    | 1.71  | 6.0E-03 |
| PCDHB11   | 2.35  | 6.1E-03 |
| F13A1     | 3.99  | 6.1E-03 |
| DMGDH     | 1.23  | 6.1E-03 |
| FAM212B   | 1.42  | 6.2E-03 |
| C5orf24   | 1.63  | 6.3E-03 |
| USP13     | 2.72  | 6.4E-03 |
| CARNS1    | 3.11  | 6.4E-03 |
| JAM2      | 7.70  | 6.4E-03 |
| CAMK2G    | 1.84  | 6.5E-03 |
| SNN       | 1.44  | 6.5E-03 |
| SORBS2    | 3.18  | 6.5E-03 |
| TSPAN18   | 1.38  | 6.5E-03 |
| VGLL2     | 3.99  | 6.5E-03 |
| 40789     | 2.63  | 6.5E-03 |
| GALNT13   | 6.31  | 6.6E-03 |
| APOBEC2   | 10.36 | 6.6E-03 |
| KLHL31    | 10.10 | 6.7E-03 |
| ITGA1     | 2.94  | 6.7E-03 |
| FRMD7     | 2.35  | 6.8E-03 |
| RAB15     | 2.23  | 6.8E-03 |
| PMEPA1    | 1.57  | 6.8E-03 |
| NCALD     | 3.37  | 7.0E-03 |
| RRAGC     | 1.60  | 7.0E-03 |
| LIMK2     | 2.06  | 7.0E-03 |
| FAM69A    | 1.86  | 7.1E-03 |
| OR1D5     | 1.53  | 7.1E-03 |
| TMEM182   | 14.65 | 7.2E-03 |
| PRKG1     | 10.09 | 7.3E-03 |
| LGR4      | 4.42  | 7.3E-03 |
| MAPK10    | 3.01  | 7.3E-03 |
| JAZF1     | 1.48  | 7.3E-03 |
| RAPGEF1   | 2.42  | 7.3E-03 |
| CDK20     | 1.37  | 7.4E-03 |
| ITGB1BP2  | 8.38  | 7.4E-03 |
| FILIP1    | 11.09 | 7.4E-03 |
| KPNA1     | 1.53  | 7.4E-03 |
| KLHDC10   | 1.43  | 7.4E-03 |
| AK1       | 2.46  | 7.5E-03 |
| TMEM117   | 2.24  | 7.5E-03 |
| SREBF2    | 1.98  | 7.5E-03 |
| MYL6B     | 2.99  | 7.6E-03 |
| CYGB      | 2.21  | 7.7E-03 |
| CACNB4    | 1.41  | 7.8E-03 |
| BAIAP2    | 1.23  | 7.8E-03 |
| SLC40A1   | 4.21  | 7.8E-03 |
| PDE2A     | 2.70  | 7.8E-03 |
| FLRT2     | 3.16  | 7.9E-03 |
| TAL2      | 3.51  | 7.9E-03 |
| TRAK1     | 1.63  | 8.0E-03 |
| VDR       | 2.77  | 8.1E-03 |
| SLC41A2   | 3.42  | 8.1E-03 |
| FAAH2     | 1.24  | 8.1E-03 |
| MOB1B     | 2.64  | 8.1E-03 |
| FBXO16    | 4.02  | 8.2E-03 |
| ICAM1     | 2.67  | 8.2E-03 |
| MYBPC1    | 62.04 | 8.2E-03 |

|          |       |         |
|----------|-------|---------|
| ABHD4    | 1.49  | 8.2E-03 |
| CYB5R1   | 2.03  | 8.3E-03 |
| ASAH1    | 2.11  | 8.3E-03 |
| NRAP     | 14.11 | 8.3E-03 |
| PHLDB1   | 1.76  | 8.4E-03 |
| MAPRE3   | 8.22  | 8.4E-03 |
| CASQ1    | 2.23  | 8.4E-03 |
| NPY6R    | 5.37  | 8.4E-03 |
| C21orf91 | 1.66  | 8.5E-03 |
| ARL4C    | 1.98  | 8.5E-03 |
| SLC4A4   | 3.58  | 8.5E-03 |
| CELF1    | 1.45  | 8.6E-03 |
| MLLT11   | 4.62  | 8.6E-03 |
| AFAP1L1  | 2.69  | 8.6E-03 |
| TRAF5    | 2.12  | 8.7E-03 |
| IL34     | 2.11  | 8.7E-03 |
| DTWD2    | 2.05  | 8.8E-03 |
| FAM190B  | 1.54  | 8.8E-03 |
| GFPT1    | 1.62  | 8.9E-03 |
| PKP2     | 2.85  | 9.0E-03 |
| PDE4DIP  | 1.94  | 9.1E-03 |
| ZNF610   | 1.83  | 9.1E-03 |
| MICU1    | 2.06  | 9.3E-03 |
| PCDHB12  | 3.04  | 9.4E-03 |
| YIPF7    | 4.22  | 9.4E-03 |
| MAS1     | 2.28  | 9.4E-03 |
| TBC1D1   | 1.72  | 9.4E-03 |
| AKD1     | 2.63  | 9.5E-03 |
| MBP      | 2.41  | 9.5E-03 |
| DHCR7    | 3.44  | 9.5E-03 |
| MYH7     | 17.04 | 9.6E-03 |
| PREPL    | 2.38  | 9.6E-03 |
| CACNB1   | 5.01  | 9.6E-03 |
| AGBL1    | 7.84  | 9.7E-03 |
| AFAP1    | 1.30  | 9.7E-03 |
| SLC36A1  | 1.94  | 9.7E-03 |
| TNNT1    | 5.11  | 9.7E-03 |
| PPM1E    | 5.41  | 9.7E-03 |
| IMPAD1   | 1.49  | 9.8E-03 |
| KCND3    | 1.46  | 9.8E-03 |
| COL19A1  | 5.93  | 9.8E-03 |
| TNNC1    | 7.23  | 9.8E-03 |
| ASB1     | 1.64  | 9.8E-03 |
| UBE2D3   | 1.30  | 9.8E-03 |
| HAGH     | 1.27  | 9.8E-03 |
| CLIC5    | 1.62  | 9.8E-03 |
| LIMCH1   | 6.90  | 9.9E-03 |
| LRRN3    | 2.56  | 1.0E-02 |
| MYL4     | 8.30  | 1.0E-02 |

---



**Table S3. DNA methylation data of normal and EDMD patient MyoD-converted myoblasts normalized to d1.** Genes queried were those showing mRNA upregulation with human myoblast –myotube transition (Encode), and then ranked by decrease of methylation at day 3 in wild-type cells.

| Gene ID  | WT    |       |       | EDMD  |       |       |
|----------|-------|-------|-------|-------|-------|-------|
|          | Day 1 | Day 3 | Day 5 | Day 1 | Day 3 | Day 5 |
| DACT1    | 1.00  | 0.47  | 0.66  | 1.00  | 0.74  | 0.89  |
| KCTD7    | 1.00  | 0.51  | 0.66  | 1.00  | 1.11  | 1.09  |
| GSK3B    | 1.00  | 0.54  | 0.76  | 1.00  | 0.82  | 0.84  |
| TPM3     | 1.00  | 0.56  | 0.68  | 1.00  | 0.57  | 0.73  |
| JAM2     | 1.00  | 0.57  | 0.70  | 1.00  | 1.21  | 1.06  |
| PADI2    | 1.00  | 0.57  | 0.78  | 1.00  | 0.93  | 0.88  |
| SAMD4A   | 1.00  | 0.59  | 0.82  | 1.00  | 0.98  | 0.87  |
| LIMCH1   | 1.00  | 0.60  | 1.05  | 1.00  | 1.01  | 0.92  |
| GPRC5C   | 1.00  | 0.60  | 0.73  | 1.00  | 0.78  | 1.01  |
| GNA14    | 1.00  | 0.61  | 0.52  | 1.00  | 0.84  | 1.17  |
| FAAH2    | 1.00  | 0.62  | 0.60  | 1.00  | 0.97  | 0.94  |
| PKP2     | 1.00  | 0.63  | 0.64  | 1.00  | 1.05  | 1.11  |
| C10orf71 | 1.00  | 0.64  | 0.45  | 1.00  | 0.84  | 0.99  |
| F13A1    | 1.00  | 0.65  | 0.74  | 1.00  | 1.14  | 1.02  |
| HUNK     | 1.00  | 0.66  | 0.81  | 1.00  | 1.08  | 0.99  |
| SC4MOL   | 1.00  | 0.66  | 0.88  | 1.00  | 0.74  | 0.83  |
| FRMD7    | 1.00  | 0.67  | 1.30  | 1.00  | 0.54  | 0.79  |
| ABHD4    | 1.00  | 0.68  | 0.64  | 1.00  | 0.99  | 1.36  |
| PGAP1    | 1.00  | 0.69  | 0.85  | 1.00  | 0.68  | 0.96  |
| CDK18    | 1.00  | 0.69  | 0.93  | 1.00  | 0.54  | 0.71  |
| PPP1R15A | 1.00  | 0.71  | 0.69  | 1.00  | 0.84  | 0.82  |
| TTC13    | 1.00  | 0.71  | 0.85  | 1.00  | 1.39  | 1.29  |
| SLCO5A1  | 1.00  | 0.72  | 0.71  | 1.00  | 1.07  | 1.06  |
| PRKCQ    | 1.00  | 0.72  | 0.99  | 1.00  | 1.12  | 1.07  |
| KLHDC10  | 1.00  | 0.73  | 1.03  | 1.00  | 0.91  | 0.93  |
| ATP8A1   | 1.00  | 0.73  | 0.78  | 1.00  | 0.84  | 1.04  |
| FABP3    | 1.00  | 0.74  | 0.92  | 1.00  | 1.19  | 1.11  |
| CASQ1    | 1.00  | 0.74  | 0.63  | 1.00  | 0.94  | 0.87  |
| TPRG1    | 1.00  | 0.76  | 0.98  | 1.00  | 0.98  | 0.97  |
| TMEM182  | 1.00  | 0.77  | 0.99  | 1.00  | 0.87  | 0.89  |
| PARM1    | 1.00  | 0.77  | 0.88  | 1.00  | 0.80  | 0.97  |
| ANKRD50  | 1.00  | 0.77  | 0.52  | 1.00  | 0.65  | 1.00  |
| HMGCS1   | 1.00  | 0.77  | 0.82  | 1.00  | 1.18  | 0.85  |
| DYNC1H1  | 1.00  | 0.77  | 0.72  | 1.00  | 0.58  | 1.09  |
| COL19A1  | 1.00  | 0.78  | 1.00  | 1.00  | 1.54  | 1.55  |
| TOM1L2   | 1.00  | 0.79  | 0.65  | 1.00  | 0.93  | 0.92  |
| CBARA1   | 1.00  | 0.79  | 0.95  | 1.00  | 0.90  | 1.05  |
| OR1D5    | 1.00  | 0.80  | 0.85  | 1.00  | 0.57  | 0.96  |
| YIPF7    | 1.00  | 0.80  | 0.88  | 1.00  | 0.83  | 1.10  |
| SCD      | 1.00  | 0.81  | 1.00  | 1.00  | 0.85  | 0.84  |
| CSRP3    | 1.00  | 0.81  | 0.73  | 1.00  | 0.98  | 1.59  |
| TGFB3    | 1.00  | 0.81  | 0.91  | 1.00  | 1.08  | 1.05  |
| FLJ32065 | 1.00  | 0.81  | 0.86  | 1.00  | 1.01  | 0.98  |
| RAB15    | 1.00  | 0.82  | 0.95  | 1.00  | 0.88  | 0.54  |
| CACNB4   | 1.00  | 0.82  | 0.90  | 1.00  | 0.87  | 0.99  |
| TNNC1    | 1.00  | 0.82  | 0.98  | 1.00  | 0.81  | 0.96  |
| NEURL    | 1.00  | 0.83  | 0.77  | 1.00  | 0.42  | 0.68  |
| KIFAP3   | 1.00  | 0.83  | 0.90  | 1.00  | 0.90  | 0.89  |
| LIMK2    | 1.00  | 0.83  | 0.94  | 1.00  | 0.74  | 0.77  |

|            |      |      |      |      |      |      |
|------------|------|------|------|------|------|------|
| MBP        | 1.00 | 0.84 | 0.79 | 1.00 | 0.98 | 1.00 |
| ERBB2      | 1.00 | 0.85 | 0.91 | 1.00 | 0.90 | 0.80 |
| NEO1       | 1.00 | 0.85 | 0.90 | 1.00 | 1.10 | 0.91 |
| DHCR7      | 1.00 | 0.85 | 0.90 | 1.00 | 1.47 | 1.10 |
| FBXO16     | 1.00 | 0.85 | 0.92 | 1.00 | 1.05 | 0.99 |
| CYB5R1     | 1.00 | 0.85 | 1.15 | 1.00 | 1.81 | 1.28 |
| CXCL12     | 1.00 | 0.86 | 0.68 | 1.00 | 1.00 | 1.11 |
| LITAF      | 1.00 | 0.86 | 1.04 | 1.00 | 0.92 | 0.94 |
| HDAC9      | 1.00 | 0.86 | 0.85 | 1.00 | 1.39 | 1.16 |
| ZFP106     | 1.00 | 0.86 | 1.13 | 1.00 | 1.16 | 1.00 |
| ZNF483     | 1.00 | 0.86 | 0.92 | 1.00 | 0.75 | 0.72 |
| KPNA1      | 1.00 | 0.87 | 1.14 | 1.00 | 1.16 | 1.08 |
| EFCAB7     | 1.00 | 0.87 | 0.97 | 1.00 | 1.05 | 0.96 |
| ENAM       | 1.00 | 0.87 | 0.92 | 1.00 | 0.99 | 0.99 |
| MYL1       | 1.00 | 0.88 | 1.00 | 1.00 | 0.78 | 0.70 |
| ATXN1      | 1.00 | 0.88 | 0.94 | 1.00 | 0.95 | 0.95 |
| HAGH       | 1.00 | 0.89 | 1.00 | 1.00 | 0.91 | 0.89 |
| DPY19L2P4  | 1.00 | 0.89 | 0.98 | 1.00 | 0.89 | 0.94 |
| SLC41A2    | 1.00 | 0.90 | 0.98 | 1.00 | 1.11 | 1.77 |
| TAL2       | 1.00 | 0.90 | 0.98 | 1.00 | 0.98 | 0.96 |
| SVIL       | 1.00 | 0.90 | 0.88 | 1.00 | 1.08 | 1.04 |
| ATP1A1     | 1.00 | 0.90 | 1.06 | 1.00 | 1.08 | 0.97 |
| ANKRD36BL1 | 1.00 | 0.90 | 0.92 | 1.00 | 1.03 | 1.10 |
| FAM189A2   | 1.00 | 0.91 | 0.96 | 1.00 | 0.86 | 0.96 |
| CACNB1     | 1.00 | 0.91 | 0.92 | 1.00 | 1.09 | 0.87 |
| NECAB3     | 1.00 | 0.91 | 0.94 | 1.00 | 0.96 | 0.91 |
| TRAK1      | 1.00 | 0.92 | 0.92 | 1.00 | 1.50 | 1.23 |
| PTPRB      | 1.00 | 0.92 | 0.90 | 1.00 | 0.54 | 0.77 |
| ATP1B4     | 1.00 | 0.92 | 0.94 | 1.00 | 0.46 | 0.62 |
| MYL4       | 1.00 | 0.92 | 0.97 | 1.00 | 1.03 | 1.02 |
| TNNT1      | 1.00 | 0.92 | 1.12 | 1.00 | 1.02 | 0.97 |
| PDE4DIP    | 1.00 | 0.92 | 0.93 | 1.00 | 0.92 | 0.98 |
| PIK3C2B    | 1.00 | 0.92 | 1.07 | 1.00 | 0.93 | 0.96 |
| CXCL13     | 1.00 | 0.92 | 0.98 | 1.00 | 0.64 | 0.86 |
| PPFIBP2    | 1.00 | 0.92 | 0.87 | 1.00 | 0.91 | 0.93 |
| CHRM4      | 1.00 | 0.92 | 0.95 | 1.00 | 1.00 | 0.98 |
| NRAP       | 1.00 | 0.93 | 0.87 | 1.00 | 1.09 | 1.04 |
| ZNF610     | 1.00 | 0.93 | 1.04 | 1.00 | 1.24 | 1.24 |
| MYH6       | 1.00 | 0.93 | 1.06 | 1.00 | 0.80 | 0.94 |
| NEK7       | 1.00 | 0.93 | 0.97 | 1.00 | 0.99 | 0.96 |
| RRAGD      | 1.00 | 0.93 | 0.95 | 1.00 | 0.87 | 0.99 |
| DCP2       | 1.00 | 0.94 | 0.89 | 1.00 | 0.92 | 1.12 |
| SOHLH2     | 1.00 | 0.94 | 0.95 | 1.00 | 0.97 | 1.03 |
| IMPAD1     | 1.00 | 0.94 | 0.95 | 1.00 | 0.94 | 0.94 |
| UAP1L1     | 1.00 | 0.94 | 1.14 | 1.00 | 0.89 | 0.98 |
| LDLR       | 1.00 | 0.94 | 0.99 | 1.00 | 1.02 | 1.03 |
| PGM5       | 1.00 | 0.94 | 0.90 | 1.00 | 0.72 | 1.03 |
| FLRT2      | 1.00 | 0.94 | 1.13 | 1.00 | 0.83 | 0.93 |
| FAM69A     | 1.00 | 0.95 | 0.96 | 1.00 | 0.98 | 0.99 |
| SHISA4     | 1.00 | 0.95 | 1.04 | 1.00 | 1.23 | 1.06 |
| KCNN3      | 1.00 | 0.95 | 1.14 | 1.00 | 0.99 | 0.98 |
| GALNT13    | 1.00 | 0.95 | 0.99 | 1.00 | 0.89 | 0.94 |
| OLFM2      | 1.00 | 0.95 | 1.01 | 1.00 | 1.06 | 1.04 |
| ENO3       | 1.00 | 0.96 | 0.96 | 1.00 | 1.04 | 1.01 |
| SGCD       | 1.00 | 0.96 | 0.99 | 1.00 | 0.96 | 0.96 |
| APOBEC2    | 1.00 | 0.96 | 0.93 | 1.00 | 0.95 | 0.95 |
| ARL4C      | 1.00 | 0.96 | 1.03 | 1.00 | 1.09 | 1.05 |
| MXRA5      | 1.00 | 0.96 | 1.13 | 1.00 | 1.09 | 1.00 |
| POLB       | 1.00 | 0.96 | 0.98 | 1.00 | 1.01 | 1.00 |
| AKNAD1     | 1.00 | 0.96 | 1.02 | 1.00 | 0.99 | 0.94 |
| MYOM3      | 1.00 | 0.96 | 1.05 | 1.00 | 1.04 | 0.93 |
| ASB14      | 1.00 | 0.96 | 0.95 | 1.00 | 1.15 | 1.03 |

|           |      |      |      |      |      |      |
|-----------|------|------|------|------|------|------|
| NAV3      | 1.00 | 0.97 | 1.04 | 1.00 | 1.14 | 1.13 |
| PPM1K     | 1.00 | 0.97 | 0.99 | 1.00 | 0.99 | 0.99 |
| KIF2A     | 1.00 | 0.97 | 1.70 | 1.00 | 0.85 | 0.86 |
| SEL1L3    | 1.00 | 0.97 | 1.08 | 1.00 | 0.91 | 0.87 |
| C1orf183  | 1.00 | 0.97 | 0.95 | 1.00 | 1.05 | 1.01 |
| DNAJA4    | 1.00 | 0.97 | 0.95 | 1.00 | 1.04 | 1.04 |
| TBC1D1    | 1.00 | 0.97 | 1.00 | 1.00 | 0.97 | 0.99 |
| ITGA6     | 1.00 | 0.97 | 1.01 | 1.00 | 1.27 | 1.22 |
| RNF19B    | 1.00 | 0.97 | 0.99 | 1.00 | 0.73 | 0.95 |
| PCDHB12   | 1.00 | 0.98 | 1.05 | 1.00 | 1.05 | 0.93 |
| LDB3      | 1.00 | 0.98 | 1.00 | 1.00 | 0.89 | 0.88 |
| PKIA      | 1.00 | 0.98 | 0.91 | 1.00 | 0.98 | 0.98 |
| SPATA13   | 1.00 | 0.98 | 1.00 | 1.00 | 1.07 | 1.04 |
| SLC4A4    | 1.00 | 0.98 | 0.98 | 1.00 | 0.98 | 1.01 |
| EGR2      | 1.00 | 0.98 | 1.00 | 1.00 | 0.80 | 0.95 |
| CACNA2D1  | 1.00 | 0.98 | 1.00 | 1.00 | 0.99 | 0.97 |
| CD36      | 1.00 | 0.98 | 0.98 | 1.00 | 0.93 | 0.91 |
| CAP2      | 1.00 | 0.98 | 1.03 | 1.00 | 0.91 | 0.61 |
| REEP1     | 1.00 | 0.98 | 0.98 | 1.00 | 1.29 | 1.25 |
| LGR4      | 1.00 | 0.98 | 0.67 | 1.00 | 1.02 | 1.07 |
| MYOM1     | 1.00 | 0.99 | 0.92 | 1.00 | 0.51 | 0.67 |
| FBXO30    | 1.00 | 0.99 | 1.00 | 1.00 | 1.03 | 1.03 |
| FRK       | 1.00 | 0.99 | 0.98 | 1.00 | 1.00 | 0.96 |
| AK1       | 1.00 | 0.99 | 1.04 | 1.00 | 1.00 | 0.94 |
| KCNA10    | 1.00 | 0.99 | 1.07 | 1.00 | 0.92 | 0.90 |
| JAZF1     | 1.00 | 0.99 | 1.03 | 1.00 | 1.02 | 1.03 |
| PPM1E     | 1.00 | 0.99 | 1.02 | 1.00 | 1.01 | 1.00 |
| DMGDH     | 1.00 | 0.99 | 1.00 | 1.00 | 0.98 | 0.99 |
| MGAT4A    | 1.00 | 0.99 | 1.06 | 1.00 | 0.89 | 0.94 |
| TRIM63    | 1.00 | 0.99 | 0.95 | 1.00 | 0.86 | 0.82 |
| GGA2      | 1.00 | 0.99 | 1.02 | 1.00 | 0.90 | 1.16 |
| DTWD2     | 1.00 | 0.99 | 0.96 | 1.00 | 1.60 | 1.41 |
| STK38L    | 1.00 | 0.99 | 0.98 | 1.00 | 1.01 | 0.98 |
| TMEM62    | 1.00 | 1.00 | 1.02 | 1.00 | 1.02 | 0.99 |
| RAPGEF1   | 1.00 | 1.00 | 1.03 | 1.00 | 0.93 | 1.02 |
| TRIM54    | 1.00 | 1.00 | 1.02 | 1.00 | 0.99 | 0.99 |
| TRAF5     | 1.00 | 1.00 | 0.99 | 1.00 | 1.08 | 1.12 |
| PCDHB11   | 1.00 | 1.00 | 1.04 | 1.00 | 1.07 | 0.99 |
| SLC36A1   | 1.00 | 1.00 | 0.98 | 1.00 | 1.01 | 0.97 |
| RBM24     | 1.00 | 1.00 | 1.02 | 1.00 | 0.88 | 0.85 |
| EGF       | 1.00 | 1.00 | 0.99 | 1.00 | 1.00 | 0.98 |
| IL34      | 1.00 | 1.01 | 1.23 | 1.00 | 1.03 | 1.08 |
| FAM190B   | 1.00 | 1.01 | 1.02 | 1.00 | 1.00 | 1.02 |
| MAS1      | 1.00 | 1.01 | 1.06 | 1.00 | 1.09 | 1.31 |
| TNNC2     | 1.00 | 1.01 | 1.02 | 1.00 | 1.09 | 1.08 |
| FRMPD1    | 1.00 | 1.01 | 1.06 | 1.00 | 1.00 | 0.86 |
| KLHL31    | 1.00 | 1.01 | 0.96 | 1.00 | 0.95 | 1.09 |
| PLXDC1    | 1.00 | 1.01 | 1.02 | 1.00 | 0.82 | 0.94 |
| HSPA12A   | 1.00 | 1.01 | 1.01 | 1.00 | 0.87 | 0.91 |
| INPP4B    | 1.00 | 1.01 | 1.06 | 1.00 | 1.04 | 1.00 |
| VDR       | 1.00 | 1.01 | 1.02 | 1.00 | 0.95 | 0.97 |
| SYNPO2L   | 1.00 | 1.01 | 0.99 | 1.00 | 1.06 | 1.23 |
| PDE7A     | 1.00 | 1.01 | 1.02 | 1.00 | 1.03 | 0.98 |
| LRRN3     | 1.00 | 1.01 | 1.00 | 1.00 | 1.09 | 1.04 |
| ASB4      | 1.00 | 1.02 | 1.04 | 1.00 | 0.96 | 0.98 |
| LOC158696 | 1.00 | 1.02 | 1.16 | 1.00 | 0.90 | 0.89 |
| CLIC5     | 1.00 | 1.02 | 0.99 | 1.00 | 0.95 | 0.98 |
| GPNMB     | 1.00 | 1.02 | 0.98 | 1.00 | 0.99 | 1.01 |
| HRASLS2   | 1.00 | 1.02 | 0.99 | 1.00 | 0.99 | 0.98 |
| HRC       | 1.00 | 1.02 | 1.06 | 1.00 | 1.19 | 1.09 |
| DHCR24    | 1.00 | 1.03 | 1.01 | 1.00 | 1.01 | 1.01 |
| COL14A1   | 1.00 | 1.03 | 0.96 | 1.00 | 0.91 | 0.98 |

|          |      |      |      |      |      |      |
|----------|------|------|------|------|------|------|
| MYOM2    | 1.00 | 1.03 | 0.90 | 1.00 | 1.22 | 1.16 |
| VASH1    | 1.00 | 1.03 | 1.04 | 1.00 | 1.01 | 1.06 |
| NPY6R    | 1.00 | 1.04 | 1.06 | 1.00 | 0.97 | 0.94 |
| TTC33    | 1.00 | 1.04 | 0.99 | 1.00 | 0.55 | 1.01 |
| MED12L   | 1.00 | 1.04 | 1.00 | 1.00 | 1.00 | 0.98 |
| CYGB     | 1.00 | 1.05 | 1.04 | 1.00 | 0.98 | 0.96 |
| AFAP1    | 1.00 | 1.06 | 1.00 | 1.00 | 0.98 | 1.01 |
| ATPGD1   | 1.00 | 1.06 | 1.04 | 1.00 | 1.00 | 1.00 |
| PRUNE    | 1.00 | 1.06 | 1.13 | 1.00 | 0.78 | 0.86 |
| ABLIM3   | 1.00 | 1.07 | 1.13 | 1.00 | 1.05 | 1.39 |
| FSD1L    | 1.00 | 1.07 | 1.11 | 1.00 | 0.97 | 1.10 |
| NBEA     | 1.00 | 1.09 | 1.01 | 1.00 | 1.04 | 1.02 |
| AGL      | 1.00 | 1.09 | 1.29 | 1.00 | 1.02 | 1.09 |
| KIAA0922 | 1.00 | 1.09 | 1.13 | 1.00 | 1.26 | 1.34 |
| ZNF148   | 1.00 | 1.10 | 1.10 | 1.00 | 0.74 | 0.89 |
| PLP1     | 1.00 | 1.12 | 1.22 | 1.00 | 0.46 | 0.67 |
| CCDC141  | 1.00 | 1.14 | 1.17 | 1.00 | 0.75 | 1.14 |
| C5orf24  | 1.00 | 1.14 | 0.76 | 1.00 | 1.16 | 0.87 |
| FILIP1   | 1.00 | 1.16 | 0.98 | 1.00 | 0.91 | 0.84 |
| SLCO2B1  | 1.00 | 1.16 | 1.18 | 1.00 | 0.45 | 0.70 |
| SNN      | 1.00 | 1.19 | 1.49 | 1.00 | 1.31 | 1.20 |
| AGBL1    | 1.00 | 1.19 | 0.75 | 1.00 | 0.85 | 0.76 |
| SNX18    | 1.00 | 1.20 | 1.52 | 1.00 | 0.77 | 1.06 |
| RNF121   | 1.00 | 1.21 | 0.93 | 1.00 | 1.09 | 0.89 |
| PMEP1    | 1.00 | 1.22 | 1.25 | 1.00 | 0.86 | 1.01 |
| AFAP1L1  | 1.00 | 1.23 | 1.11 | 1.00 | 1.29 | 1.41 |
| DCX      | 1.00 | 1.23 | 1.52 | 1.00 | 1.12 | 1.06 |
| BAIAP2   | 1.00 | 1.23 | 1.17 | 1.00 | 0.83 | 0.90 |
| PSEN2    | 1.00 | 1.29 | 1.37 | 1.00 | 1.33 | 1.53 |
| DCLK2    | 1.00 | 1.33 | 1.36 | 1.00 | 0.96 | 1.31 |
| PKHD1    | 1.00 | 1.36 | 1.41 | 1.00 | 1.00 | 1.23 |
| ICAM1    | 1.00 | 1.41 | 1.16 | 1.00 | 0.99 | 1.08 |
| EXOC6    | 1.00 | 1.52 | 1.62 | 1.00 | 1.33 | 1.40 |
| GPR98    | 1.00 | 1.54 | 1.17 | 1.00 | 1.15 | 0.91 |
| VGLL2    | 1.00 | 1.66 | 0.86 | 1.00 | 0.86 | 1.23 |
| 42262    | 1.00 | 1.90 | 1.58 | 1.00 | 1.13 | 1.52 |

---

**Table S4. Human myogenic cells infected with EDMD LMNA variant show differential DNA methylation levels on myogenic and cell cycle genes.** Transcriptionally deregulated genes in EDMD (3) show differential methylation levels in EDMD when compared to WT (column 2 and 3), and FPLD LMNA mutation (column 3 and 4). Comparison between FPLD mutation and WT LMNA is shown column 5 and 6. Analysis was done using ANOVA (+/- 1.2 Fold Change with p<0.05 FDR corrected).

| Gene Symbol | EDMD vs. WT        |               | EDMD vs. FPLD      |               | FPLD vs. WT        |               |
|-------------|--------------------|---------------|--------------------|---------------|--------------------|---------------|
|             | <b>Fold Change</b> | p-value (FDR) | <b>Fold Change</b> | p-value (FDR) | <b>Fold Change</b> | p-value (FDR) |
| HDAC1       | -1.33872           | 1.09E-03      | -1.32502           | 1.19E-03      | -1.01034           | 3.46E-01      |
| RB1         | -1.22808           | 1.14E-03      | -1.22007           | 1.22E-03      | -1.00657           | 4.07E-01      |
| MYOD1       | 1.46129            | 4.61E-03      | 1.41385            | 5.36E-03      | 1.03355            | 3.97E-01      |
| CHRNG       | -1.20232           | 1.13E-02      | -1.21936           | 9.67E-03      | 1.01417            | 5.15E-01      |
| MCM3        | -1.2192            | 1.26E-02      | -1.2243            | 1.21E-02      | 1.00418            | 8.57E-01      |

**Table S5. Heterochromatin peaks (H3K9me3) showing decreased enrichment in emerlin-null cell during myogenic transition (d0 to d1).** Peaks for each condition were called using SICER (window size 1000bp, gap size 3000 bp and FDR1e-2) and merged to find union peaks. Union peak file was annotated with read counts and normalized to corresponding library sizes. Peaks showing decrease at day 0 and day 1 were annotated using GREAT to identify genes associated with these peaks.

| Chromosomal position |           |           | Normalized read counts |        |        |        |        |       | Ratio |       |       | Great Annotation     |
|----------------------|-----------|-----------|------------------------|--------|--------|--------|--------|-------|-------|-------|-------|----------------------|
| chr                  | start     | end       | emd-d0                 | wt-d0  | emd-d1 | wt-d1  | emd-d2 | wt-d2 | day 0 | day 1 | day 2 | Gene Symbol          |
| chr1                 | 63957000  | 63972999  | 110.4                  | 136.11 | 143.02 | 160.67 | 160.83 | 156.4 | 0.81  | 0.89  | 1.03  | Fastkd2, Klf7        |
| chr1                 | 189262000 | 189276999 | 111.51                 | 124.5  | 105.68 | 111.38 | 101.32 | 101.2 | 0.9   | 0.95  | 1     | Esrrg, Gpatch2       |
| chr1                 | 35633000  | 35636999  | 31.19                  | 38.43  | 32.25  | 34.24  | 37.53  | 41.2  | 0.81  | 0.94  | 0.91  | Hs6st1, Plekhh2      |
| chr1                 | 38371000  | 38374999  | 30.64                  | 35.63  | 30.56  | 33.49  | 34.31  | 28.8  | 0.86  | 0.91  | 1.19  | Rev1, Aff3           |
| chr1                 | 58793000  | 58805999  | 160.08                 | 236.98 | 193.95 | 229.15 | 194.6  | 181.2 | 0.68  | 0.85  | 1.07  | Casp8, Cflar         |
| chr1                 | 91814000  | 91842999  | 237.36                 | 270.21 | 286.05 | 307.04 | 315.76 | 275.6 | 0.88  | 0.93  | 1.15  | Gbx2                 |
| chr1                 | 122188000 | 122199999 | 92.74                  | 111.69 | 94.64  | 100.09 | 92.21  | 88    | 0.83  | 0.95  | 1.05  | C1ql2, Steap3        |
| chr1                 | 127283000 | 127288999 | 72.31                  | 93.27  | 98.04  | 118.53 | 90.6   | 72    | 0.78  | 0.83  | 1.26  | Actr3                |
| chr1                 | 156843000 | 156847999 | 42.78                  | 48.44  | 43.29  | 47.41  | 41.28  | 38    | 0.88  | 0.91  | 1.09  | Cacna1e, Mr1         |
| chr1                 | 163118000 | 163123999 | 48.58                  | 59.25  | 50.5   | 62.46  | 64.87  | 60    | 0.82  | 0.81  | 1.08  | Ankrd45, Prdx6       |
| chr1                 | 173421000 | 173430999 | 71.21                  | 86.47  | 88.28  | 94.07  | 88.46  | 92    | 0.82  | 0.94  | 0.96  | Refbp2, F11r         |
| chr1                 | 180678000 | 180687999 | 106.26                 | 119.69 | 125.62 | 133.2  | 131.34 | 115.6 | 0.89  | 0.94  | 1.14  | Kif26b, Smyd3        |
| chr1                 | 184636000 | 184659999 | 184.92                 | 213.77 | 197.35 | 209.59 | 213.37 | 205.2 | 0.87  | 0.94  | 1.04  | 4922505E12Rik, Capn8 |
| chr1                 | 184610000 | 184631999 | 188.79                 | 211.36 | 183.34 | 197.55 | 201.04 | 170.8 | 0.89  | 0.93  | 1.18  | 4922505E12Rik, Capn8 |
| chr1                 | 187316000 | 187322999 | 46.92                  | 60.85  | 57.72  | 61.33  | 75.59  | 53.2  | 0.77  | 0.94  | 1.42  | Slc30a10, Lyplal1    |
| chr1                 | 193887000 | 193891999 | 52.16                  | 72.86  | 87     | 92.19  | 81.49  | 90.4  | 0.72  | 0.94  | 0.9   | Traf5, Rd3           |
| chr1                 | 43077000  | 43081999  | 45.82                  | 53.24  | 38.2   | 48.92  | 47.18  | 45.2  | 0.86  | 0.78  | 1.04  | Gpr45, Tgfbrap1      |
| chr1                 | 63244000  | 63247999  | 36.16                  | 46.44  | 33.95  | 60.96  | 56.29  | 60.4  | 0.78  | 0.56  | 0.93  | Gpr1, Eef1b2         |
| chr1                 | 93019000  | 93025999  | 65.41                  | 80.46  | 87     | 92.56  | 98.64  | 100.8 | 0.81  | 0.94  | 0.98  | Rbm44, Lrrfip1       |
| chr1                 | 168963000 | 168965999 | 25.12                  | 32.43  | 24.62  | 35.37  | 25.2   | 23.6  | 0.77  | 0.7   | 1.07  | Fam78b, Uck2         |
| chr1                 | 194099000 | 194099999 | 10.21                  | 14.01  | 8.06   | 9.41   | 13.4   | 12.8  | 0.73  | 0.86  | 1.05  | Kcnh1, Hhat          |
| chr10                | 84013000  | 84025999  | 111.51                 | 129.7  | 133.69 | 146.75 | 153.32 | 123.2 | 0.86  | 0.91  | 1.24  | Ckap4, Tcp11l2       |
| chr10                | 120321000 | 120331999 | 78.94                  | 112.09 | 95.07  | 105.73 | 120.09 | 109.2 | 0.7   | 0.9   | 1.1   | Hmga2, Msrb3         |
| chr10                | 121234000 | 121247999 | 96.05                  | 111.69 | 106.1  | 114.77 | 106.15 | 101.2 | 0.86  | 0.92  | 1.05  | BC048403, Srgap1     |
| chr10                | 68434000  | 68450999  | 112.61                 | 128.1  | 122.23 | 131.32 | 156    | 132   | 0.88  | 0.93  | 1.18  | Rhobtb1, Tmem26      |
| chr10                | 69446000  | 69456999  | 141.87                 | 178.94 | 157.88 | 167.44 | 172.62 | 187.6 | 0.79  | 0.94  | 0.92  | Ccdc6, Ank3          |
| chr10                | 75609000  | 75613999  | 39.74                  | 52.04  | 42.02  | 51.55  | 40.21  | 45.6  | 0.76  | 0.82  | 0.88  | Slc5a4a, Prmt2       |
| chr10                | 78520000  | 78535999  | 152.91                 | 200.96 | 204.56 | 227.65 | 240.71 | 218.8 | 0.76  | 0.9   | 1.1   | Olf57, 2610008E11Rik |
| chr10                | 83122000  | 83132999  | 77.56                  | 94.87  | 88.28  | 94.82  | 93.82  | 96.4  | 0.82  | 0.93  | 0.97  | 1500009L16Rik, Appl2 |
| chr10                | 94343000  | 94369999  | 211.7                  | 235.78 | 234.27 | 247.97 | 256.79 | 264.8 | 0.9   | 0.94  | 0.97  | Plxnc1, Ccdc41       |
| chr10                | 120607000 | 120643999 | 278.49                 | 311.44 | 277.13 | 302.15 | 312.01 | 297.2 | 0.89  | 0.92  | 1.05  | Tbc1d30, Wif1        |
| chr10                | 121336000 | 121360999 | 175.54                 | 216.97 | 197.77 | 214.1  | 220.34 | 177.2 | 0.81  | 0.92  | 1.24  | Srgap1, BC048403     |
| chr10                | 126057000 | 126062999 | 54.1                   | 60.85  | 47.53  | 56.07  | 35.38  | 45.2  | 0.89  | 0.85  | 0.78  | Xrcc6bp1, Lrig3      |
| chr10                | 40250000  | 40253999  | 30.36                  | 40.43  | 36.92  | 39.51  | 47.71  | 34.4  | 0.75  | 0.93  | 1.39  | Slc22a16, Cdk19      |
| chr10                | 41064000  | 41064999  | 8.56                   | 12.41  | 6.79   | 10.91  | 8.58   | 9.2   | 0.69  | 0.62  | 0.93  | Zbtb24, Fig4         |
| chr10                | 42641000  | 42644999  | 40.3                   | 45.24  | 35.65  | 43.65  | 46.64  | 50.4  | 0.89  | 0.82  | 0.93  | Scml4, Sobp          |
| chr10                | 63018000  | 63019999  | 20.7                   | 26.82  | 23.34  | 24.83  | 33.77  | 18.4  | 0.77  | 0.94  | 1.84  | Ctnna1, Lrrtm3       |
| chr10                | 67453000  | 67465999  | 132.76                 | 148.11 | 138.35 | 183.62 | 132.95 | 140.8 | 0.9   | 0.75  | 0.94  | Rtkn2, Arid5b        |
| chr10                | 67470000  | 67482999  | 141.31                 | 217.37 | 168.06 | 200.56 | 175.84 | 183.2 | 0.65  | 0.84  | 0.96  | Rtkn2, Arid5b        |
| chr10                | 67554000  | 67565999  | 123.37                 | 154.52 | 140.9  | 158.79 | 128.66 | 140   | 0.8   | 0.89  | 0.92  | Rtkn2, Arid5b        |

|       |           |           |         |         |         |         |         |        |      |      |      |                       |
|-------|-----------|-----------|---------|---------|---------|---------|---------|--------|------|------|------|-----------------------|
| chr10 | 70306000  | 70311999  | 70.93   | 92.87   | 84.03   | 92.56   | 82.02   | 81.2   | 0.76 | 0.91 | 1.01 | Phyhipl, Bicc1        |
| chr10 | 75097000  | 75103999  | 61.83   | 69.25   | 69.6    | 80.15   | 69.69   | 68.8   | 0.89 | 0.87 | 1.01 | Susd2, Ggt5           |
| chr10 | 75536000  | 75539999  | 43.88   | 52.44   | 47.11   | 50.42   | 53.61   | 50     | 0.84 | 0.93 | 1.07 | Slc5a4b, Zfp280b      |
| chr10 | 78550000  | 78555999  | 49.4    | 61.65   | 46.68   | 58.7    | 60.58   | 60.8   | 0.8  | 0.8  | 1    | 2610008E11Rik, Olfr57 |
| chr10 | 84692000  | 84696999  | 37.81   | 44.43   | 37.35   | 44.4    | 40.21   | 42.8   | 0.85 | 0.84 | 0.94 | Btbd11, Cry1          |
| chr10 | 89211000  | 89215999  | 50.78   | 59.65   | 52.63   | 62.84   | 56.83   | 53.2   | 0.85 | 0.84 | 1.07 | Anks1b, Uhrf1bp11     |
| chr10 | 94443000  | 94450999  | 60.45   | 79.26   | 67.9    | 77.89   | 65.94   | 66.4   | 0.76 | 0.87 | 0.99 | Plxnc1, Cradd         |
| chr10 | 116910000 | 116912999 | 35.05   | 39.23   | 39.89   | 47.03   | 52.54   | 42     | 0.89 | 0.85 | 1.25 | Cpm, Cpsf6            |
| chr10 | 119440000 | 119447999 | 66.24   | 73.66   | 66.63   | 71.12   | 70.76   | 56.4   | 0.9  | 0.94 | 1.25 | Helb, Grip1           |
| chr10 | 119479000 | 119479999 | 8.28    | 9.21    | 8.06    | 10.16   | 10.72   | 8      | 0.9  | 0.79 | 1.34 | Helb, Grip1           |
| chr10 | 127410000 | 127415999 | 50.78   | 59.25   | 53.9    | 63.59   | 67.55   | 66.8   | 0.86 | 0.85 | 1.01 | Hsd17b6, Sdr9c7       |
| chr10 | 128437000 | 128446999 | 84.18   | 110.49  | 122.65  | 129.44  | 135.63  | 150    | 0.76 | 0.95 | 0.9  | Olfr763, Olfr9        |
| chr11 | 64486000  | 64492999  | 71.21   | 80.46   | 67.9    | 71.87   | 69.69   | 72     | 0.89 | 0.94 | 0.97 | Elac2, Hs3st3a1       |
| chr11 | 49637000  | 49648999  | 96.88   | 107.68  | 100.16  | 114.39  | 91.14   | 84.4   | 0.9  | 0.88 | 1.08 | Mapk9, Gfpt2          |
| chr11 | 59274000  | 59279999  | 65.97   | 92.47   | 96.76   | 103.1   | 124.91  | 116.8  | 0.71 | 0.94 | 1.07 | Zfp867, Jmjd4         |
| chr11 | 94318000  | 94325999  | 58.24   | 66.45   | 60.27   | 66.6    | 64.33   | 52.8   | 0.88 | 0.9  | 1.22 | Abcc3, Cacna1g        |
| chr11 | 96109000  | 96142999  | 277.66  | 316.25  | 344.19  | 370.26  | 324.88  | 369.6  | 0.88 | 0.93 | 0.88 | Hoxb9, AK078566       |
| chr11 | 96221000  | 96237999  | 154.84  | 188.15  | 172.31  | 200.93  | 189.24  | 198.8  | 0.82 | 0.86 | 0.95 | Skap1, Hoxb1          |
| chr11 | 108759000 | 108779999 | 176.37  | 198.55  | 187.16  | 203.94  | 211.22  | 197.2  | 0.89 | 0.92 | 1.07 | Axin2, Ccdc46         |
| chr11 | 113258000 | 113263999 | 69.28   | 85.27   | 74.27   | 74.13   | 61.65   | 70     | 0.81 | 0.78 | 0.88 | Slc39a11, Sox9        |
| chr11 | 120619000 | 120626999 | 66.24   | 86.87   | 98.04   | 112.13  | 107.22  | 94.8   | 0.76 | 0.87 | 1.13 | Cbr2, Rfng            |
| chr11 | 3000000   | 3004999   | 153.46  | 1921.89 | 150.66  | 1906.61 | 165.65  | 1698.4 | 0.08 | 0.08 | 0.1  | Sfil                  |
| chr11 | 11897000  | 11897999  | 6.07    | 7.21    | 5.09    | 9.41    | 7.51    | 8      | 0.84 | 0.54 | 0.94 | Ddc, Grb10            |
| chr11 | 52537000  | 52539999  | 20.15   | 25.22   | 26.31   | 27.84   | 20.37   | 28.8   | 0.8  | 0.94 | 0.71 | Fstl4, 9530068E07Rik  |
| chr11 | 63652000  | 63657999  | 45.26   | 53.64   | 44.56   | 52.3    | 50.93   | 50     | 0.84 | 0.85 | 1.02 | Hs3st3b1, Pmp22       |
| chr11 | 63937000  | 63942999  | 48.3    | 54.04   | 48.81   | 52.68   | 61.12   | 40.8   | 0.89 | 0.93 | 1.5  | Hs3st3a1, Cox10       |
| chr11 | 64751000  | 64759999  | 58.79   | 66.05   | 59.42   | 66.23   | 59.51   | 49.2   | 0.89 | 0.9  | 1.21 | Elac2, Hs3st3a1       |
| chr11 | 81555000  | 81555999  | 12.14   | 14.01   | 7.64    | 12.42   | 8.58    | 10     | 0.87 | 0.62 | 0.86 | Ccl2, 1700071K01Rik   |
| chr11 | 95787000  | 95789999  | 27.88   | 35.63   | 28.86   | 45.15   | 40.74   | 28     | 0.78 | 0.64 | 1.46 | B4galnt2, Igf2bp1     |
| chr11 | 96213000  | 96216999  | 30.64   | 39.23   | 40.74   | 45.15   | 31.63   | 50     | 0.78 | 0.9  | 0.63 | Hoxb1, Hoxb2          |
| chr11 | 96341000  | 96353999  | 87.49   | 105.28  | 99.31   | 111.38  | 113.12  | 114.8  | 0.83 | 0.89 | 0.99 | Skap1, Snx11          |
| chr11 | 96358000  | 96358999  | 8       | 9.21    | 8.06    | 11.29   | 9.11    | 9.6    | 0.87 | 0.71 | 0.95 | Skap1, Snx11          |
| chr11 | 96395000  | 96398999  | 24.84   | 34.03   | 28.43   | 30.48   | 27.34   | 37.2   | 0.73 | 0.93 | 0.73 | Skap1, Snx11          |
| chr12 | 71489000  | 71499999  | 78.39   | 87.27   | 82.76   | 88.05   | 78.27   | 74.4   | 0.9  | 0.94 | 1.05 | Tmx1, Trim9           |
| chr12 | 110848000 | 110856999 | 109.02  | 126.1   | 112.47  | 129.82  | 107.22  | 101.6  | 0.86 | 0.87 | 1.06 | Dio3, Rtl1            |
| chr12 | 111034000 | 111047999 | 125.03  | 159.72  | 150.24  | 160.29  | 138.31  | 140.8  | 0.78 | 0.94 | 0.98 | Dio3, Rtl1            |
| chr12 | 3109000   | 3110999   | 1206.69 | 1406.29 | 1214.64 | 1375.68 | 1313.44 | 1384   | 0.86 | 0.88 | 0.95 | Rab10                 |
| chr12 | 27837000  | 27837999  | 7.18    | 10.01   | 4.67    | 9.78    | 9.65    | 7.2    | 0.72 | 0.48 | 1.34 | Sox11, Cmpk2          |
| chr12 | 57368000  | 57375999  | 60.72   | 68.05   | 77.67   | 82.03   | 65.4    | 62.8   | 0.89 | 0.95 | 1.04 | Mbip, Brms11          |
| chr12 | 75904000  | 75905999  | 245.92  | 274.61  | 235.12  | 274.31  | 267.51  | 279.2  | 0.9  | 0.86 | 0.96 | Kcnh5, Dbpht2         |
| chr12 | 81645000  | 81648999  | 35.33   | 39.63   | 37.35   | 39.51   | 27.34   | 36.8   | 0.89 | 0.95 | 0.74 | Galnt11, Erh          |
| chr12 | 85525000  | 85527999  | 55.2    | 68.05   | 78.51   | 84.66   | 80.41   | 85.2   | 0.81 | 0.93 | 0.94 | Pnma1, C130039O16Rik  |
| chr13 | 43150000  | 43163999  | 87.22   | 100.08  | 95.49   | 101.97  | 92.74   | 98.4   | 0.87 | 0.94 | 0.94 | Tbcd17, Phactr1       |
| chr13 | 45187000  | 45187999  | 11.32   | 12.81   | 8.06    | 9.41    | 17.16   | 9.6    | 0.88 | 0.86 | 1.79 | Mylip, Dtnbp1         |
| chr13 | 47095000  | 47109999  | 154.29  | 206.56  | 178.67  | 191.53  | 204.25  | 191.6  | 0.75 | 0.93 | 1.07 | Kif13a, Nhlrc1        |
| chr13 | 54531000  | 54545999  | 115.92  | 131.3   | 123.5   | 140.73  | 152.79  | 141.2  | 0.88 | 0.88 | 1.08 | Thoc3, Cplx2          |
| chr13 | 54848000  | 54854999  | 56.31   | 63.25   | 61.96   | 76.76   | 67.55   | 72     | 0.89 | 0.81 | 0.94 | Gprin1                |
| chr13 | 56246000  | 56250999  | 37.54   | 46.84   | 42.44   | 54.56   | 51.47   | 50.8   | 0.8  | 0.78 | 1.01 | H2afy, Tifab          |
| chr13 | 60305000  | 60326999  | 177.75  | 200.56  | 236.82  | 249.85  | 264.83  | 236.4  | 0.89 | 0.95 | 1.12 | Dapk1, Gas1           |
| chr13 | 67174000  | 67178999  | 33.12   | 43.63   | 38.62   | 41.77   | 41.82   | 47.2   | 0.76 | 0.92 | 0.89 | Zfp712, Zfp708        |
| chr13 | 83855000  | 83872999  | 115.37  | 133.7   | 152.78  | 177.6   | 165.12  | 182.4  | 0.86 | 0.86 | 0.91 | Tmem161b, Mef2c       |
| chr13 | 84375000  | 84377999  | 30.64   | 42.03   | 35.23   | 37.25   | 52      | 43.6   | 0.73 | 0.95 | 1.19 | Ccnh, Tmem161b        |
| chr13 | 13018000  | 13024999  | 102.95  | 148.92  | 108.22  | 146.37  | 109.36  | 133.2  | 0.69 | 0.74 | 0.82 | Prl2c3, Prl2c2        |

|       |           |           |        |        |        |        |        |       |      |      |      |                       |
|-------|-----------|-----------|--------|--------|--------|--------|--------|-------|------|------|------|-----------------------|
| chr13 | 38241000  | 38247999  | 60.45  | 71.66  | 58.14  | 75.63  | 73.98  | 73.6  | 0.84 | 0.77 | 1.01 | Snrnp48, Dsp          |
| chr13 | 45171000  | 45177999  | 51.89  | 64.05  | 58.14  | 61.33  | 75.05  | 55.2  | 0.81 | 0.95 | 1.36 | Mylip, Dtnbp1         |
| chr13 | 45714000  | 45721999  | 115.92 | 144.51 | 129.87 | 151.64 | 137.24 | 136   | 0.8  | 0.86 | 1.01 | Gmpr, Atxn1           |
| chr13 | 46129000  | 46130999  | 14.9   | 18.01  | 16.98  | 18.06  | 13.4   | 16.8  | 0.83 | 0.94 | 0.8  | Gm1574, Atxn1         |
| chr13 | 48580000  | 48593999  | 122.82 | 148.52 | 138.35 | 153.15 | 157.61 | 146.4 | 0.83 | 0.9  | 1.08 | Zfp169, Id4           |
| chr13 | 53760000  | 53767999  | 77.01  | 87.27  | 77.67  | 84.29  | 75.05  | 66.8  | 0.88 | 0.92 | 1.12 | Msx2, Drd1a           |
| chr13 | 67591000  | 67597999  | 49.96  | 61.65  | 57.29  | 64.34  | 65.4   | 62.4  | 0.81 | 0.89 | 1.05 | Zfp874b, Zfp58        |
| chr13 | 99238000  | 99249999  | 96.6   | 126.5  | 114.16 | 123.04 | 134.02 | 117.6 | 0.76 | 0.93 | 1.14 | Foxd1, Tmem174        |
| chr13 | 99570000  | 99570999  | 17.39  | 19.62  | 14.43  | 18.06  | 23.05  | 24.8  | 0.89 | 0.8  | 0.93 | Tmem171, Fcho2        |
| chr13 | 107942000 | 107947999 | 43.61  | 49.24  | 39.47  | 46.28  | 40.74  | 42    | 0.89 | 0.85 | 0.97 | Kif2a, Zswim6         |
| chr13 | 112396000 | 112406999 | 75.63  | 89.27  | 78.94  | 89.18  | 80.41  | 78    | 0.85 | 0.89 | 1.03 | Gpbp1, Mier3          |
| chr13 | 112464000 | 112473999 | 72.04  | 97.28  | 83.61  | 88.05  | 99.18  | 81.6  | 0.74 | 0.95 | 1.22 | Gpbp1, Mier3          |
| chr13 | 115165000 | 115167999 | 26.22  | 34.83  | 30.98  | 33.11  | 33.24  | 31.2  | 0.75 | 0.94 | 1.07 | Ndufs4, Arl15         |
| chr14 | 48641000  | 48647999  | 50.51  | 58.85  | 52.2   | 60.2   | 65.4   | 51.6  | 0.86 | 0.87 | 1.27 | Peli2, Ktn1           |
| chr14 | 76053000  | 76054999  | 19.04  | 24.82  | 16.98  | 19.94  | 15.55  | 18.4  | 0.77 | 0.85 | 0.84 | 4930564B18Rik, Cog3   |
| chr14 | 104870000 | 104873999 | 42.5   | 57.64  | 49.66  | 58.32  | 50.93  | 50.8  | 0.74 | 0.85 | 1    | Pou4f1                |
| chr14 | 118831000 | 118833999 | 24.29  | 32.83  | 24.19  | 30.48  | 24.12  | 25.2  | 0.74 | 0.79 | 0.96 | Sox21, Abcc4          |
| chr14 | 25419000  | 25423999  | 43.33  | 51.24  | 44.56  | 47.41  | 52.54  | 45.2  | 0.85 | 0.94 | 1.16 | Zmiz1, Rps24          |
| chr14 | 28238000  | 28241999  | 36.71  | 54.44  | 50.93  | 54.94  | 56.29  | 61.2  | 0.67 | 0.93 | 0.92 | D14Abb1e              |
| chr14 | 37859000  | 37861999  | 16.56  | 22.82  | 19.1   | 21.45  | 22.52  | 20.4  | 0.73 | 0.89 | 1.1  | Fam190b, Rgr          |
| chr14 | 46685000  | 46687999  | 23.74  | 28.42  | 29.28  | 31.61  | 23.05  | 28    | 0.84 | 0.93 | 0.82 | Ddhd1, Gm15217        |
| chr14 | 55826000  | 55827999  | 30.91  | 34.43  | 30.98  | 36.88  | 42.89  | 40    | 0.9  | 0.84 | 1.07 | Jph4, Dhrs2           |
| chr14 | 58952000  | 58962999  | 86.67  | 130.1  | 91.67  | 100.47 | 105.08 | 87.2  | 0.67 | 0.91 | 1.2  | Fgf9, 1700129C05Rik   |
| chr14 | 61823000  | 61831999  | 93.29  | 120.89 | 84.88  | 107.24 | 92.74  | 125.2 | 0.77 | 0.79 | 0.74 | Sacs, Sgcg            |
| chr14 | 64691000  | 64699999  | 62.65  | 72.06  | 70.03  | 73.75  | 71.3   | 77.6  | 0.87 | 0.95 | 0.92 | Prss55, Rp111         |
| chr14 | 65198000  | 65199999  | 24.29  | 27.62  | 18.67  | 24.83  | 20.37  | 24.8  | 0.88 | 0.75 | 0.82 | MsrA, Kif13b          |
| chr14 | 73401000  | 73403999  | 34.22  | 41.63  | 37.35  | 42.9   | 46.1   | 35.2  | 0.82 | 0.87 | 1.31 | Fndc3a, Cysltr2       |
| chr14 | 75476000  | 75478999  | 19.32  | 26.02  | 22.07  | 28.22  | 24.66  | 21.2  | 0.74 | 0.78 | 1.16 | Lrrc63, 5031414D18Rik |
| chr14 | 79057000  | 79061999  | 58.24  | 75.26  | 58.57  | 66.23  | 77.2   | 60.4  | 0.77 | 0.88 | 1.28 | Akap11, Dgkh          |
| chr14 | 120835000 | 120839999 | 43.88  | 52.44  | 55.17  | 59.83  | 53.07  | 56.4  | 0.84 | 0.92 | 0.94 | Rap2a, Mbnl2          |
| chr14 | 121347000 | 121351999 | 46.64  | 52.44  | 52.2   | 63.21  | 58.97  | 46.8  | 0.89 | 0.83 | 1.26 | Farp1, Ipo5           |
| chr14 | 122229000 | 122240999 | 109.57 | 137.71 | 113.74 | 123.42 | 134.02 | 124.4 | 0.8  | 0.92 | 1.08 | Dock9, Ubac2          |
| chr14 | 122737000 | 122739999 | 21.25  | 28.42  | 23.77  | 27.09  | 20.37  | 19.2  | 0.75 | 0.88 | 1.06 | Zic5, Clybl           |
| chr15 | 79690000  | 79708999  | 112.89 | 134.5  | 131.99 | 142.61 | 149.04 | 134.8 | 0.84 | 0.93 | 1.11 | Npcd, Apobec3         |
| chr15 | 25744000  | 25758999  | 120.34 | 158.52 | 132.41 | 154.65 | 149.57 | 144.8 | 0.76 | 0.86 | 1.03 | Fam134b, Myo10        |
| chr15 | 56075000  | 56082999  | 52.72  | 60.45  | 68.33  | 75.26  | 68.62  | 78    | 0.87 | 0.91 | 0.88 | Sntb1, Has2           |
| chr15 | 96446000  | 96455999  | 104.05 | 116.89 | 105.25 | 127.56 | 134.02 | 119.6 | 0.89 | 0.83 | 1.12 | Scaf11, Slc38a1       |
| chr15 | 97466000  | 97476999  | 107.37 | 125.7  | 105.68 | 114.39 | 112.04 | 107.6 | 0.85 | 0.92 | 1.04 | Amigo2, Rpap3         |
| chr15 | 25763000  | 25770999  | 81.42  | 106.08 | 87.43  | 108.74 | 119.55 | 107.2 | 0.77 | 0.8  | 1.12 | Fam134b, Myo10        |
| chr15 | 25775000  | 25786999  | 115.65 | 140.91 | 128.59 | 142.99 | 128.13 | 135.2 | 0.82 | 0.9  | 0.95 | Zfp622, Fam134b       |
| chr15 | 38644000  | 38648999  | 59.89  | 78.06  | 61.11  | 65.85  | 69.69  | 70    | 0.77 | 0.93 | 1    | BaalC, Atp6v1c1       |
| chr15 | 58447000  | 58457999  | 76.45  | 86.87  | 78.94  | 93.69  | 94.89  | 90.8  | 0.88 | 0.84 | 1.05 | Tmem65, D15Erd621e    |
| chr15 | 86625000  | 86625999  | 11.04  | 12.41  | 8.06   | 13.17  | 11.26  | 12    | 0.89 | 0.61 | 0.94 | Fam19a5, Tbc1d22a     |
| chr16 | 56095000  | 56100999  | 44.99  | 58.85  | 61.96  | 69.24  | 82.02  | 59.6  | 0.76 | 0.89 | 1.38 | Impg2, Senp7          |
| chr16 | 44448000  | 44454999  | 56.58  | 63.65  | 63.24  | 69.24  | 63.8   | 60.4  | 0.89 | 0.91 | 1.06 | Wdr52, Boc            |
| chr16 | 48297000  | 48303999  | 43.06  | 53.64  | 54.75  | 64.72  | 58.43  | 57.2  | 0.8  | 0.85 | 1.02 | Dppa2, Dppa4          |
| chr16 | 87587000  | 87601999  | 120.06 | 144.11 | 141.75 | 162.93 | 134.02 | 159.2 | 0.83 | 0.87 | 0.84 | Bach1, ORF63          |
| chr16 | 90353000  | 90363999  | 73.42  | 86.47  | 83.18  | 90.68  | 112.04 | 100   | 0.85 | 0.92 | 1.12 | Scaf4, Hunk           |
| chr16 | 90616000  | 90619999  | 30.08  | 35.23  | 22.49  | 28.6   | 29.49  | 29.2  | 0.85 | 0.79 | 1.01 | 2610039C10Rik, Hunk   |
| chr16 | 92473000  | 92509999  | 308.85 | 346.27 | 369.23 | 390.2  | 393.5  | 367.2 | 0.89 | 0.95 | 1.07 | Rcan1, Clic6          |
| chr16 | 17270000  | 17271999  | 24.29  | 30.02  | 31.83  | 35.75  | 40.21  | 34    | 0.81 | 0.89 | 1.18 | Tmem191c, Hic2        |
| chr16 | 22184000  | 22195999  | 79.49  | 90.47  | 87     | 93.32  | 107.76 | 89.2  | 0.88 | 0.93 | 1.21 | Igf2bp2, Tra2b        |
| chr16 | 23178000  | 23179999  | 18.77  | 21.62  | 20.8   | 24.83  | 19.3   | 14.8  | 0.87 | 0.84 | 1.3  | St6gal1, Adipoq       |



|       |           |           |        |         |         |         |         |       |      |      |      |                       |
|-------|-----------|-----------|--------|---------|---------|---------|---------|-------|------|------|------|-----------------------|
| chr16 | 38220000  | 38221999  | 26.5   | 46.44   | 35.65   | 39.51   | 30.56   | 30.4  | 0.57 | 0.9  | 1.01 | Nr1i2, Gsk3b          |
| chr16 | 91165000  | 91166999  | 10.76  | 14.81   | 12.73   | 14.3    | 16.62   | 11.2  | 0.73 | 0.89 | 1.48 | 4932438H23Rik, Olig2  |
| chr17 | 4961000   | 4969999   | 56.03  | 65.25   | 64.93   | 73.37   | 77.2    | 59.2  | 0.86 | 0.88 | 1.3  | Arid1b                |
| chr17 | 8575000   | 8585999   | 85.84  | 95.67   | 96.34   | 103.1   | 109.36  | 106.8 | 0.9  | 0.93 | 1.02 | T, Prr18              |
| chr17 | 12644000  | 12654999  | 76.73  | 88.07   | 87.85   | 94.82   | 90.06   | 91.2  | 0.87 | 0.93 | 0.99 | Slc22a3, Plg          |
| chr17 | 23754000  | 23760999  | 45.82  | 64.05   | 50.5    | 57.19   | 55.75   | 57.2  | 0.72 | 0.88 | 0.97 | Zscan10, Mmp25        |
| chr17 | 28518000  | 28526999  | 81.97  | 98.48   | 96.34   | 115.52  | 102.39  | 108.4 | 0.83 | 0.83 | 0.94 | Tulp1, Fkbp5          |
| chr17 | 33471000  | 33475999  | 35.6   | 42.03   | 31.41   | 46.66   | 41.28   | 39.6  | 0.85 | 0.67 | 1.04 | Zfp81, Zfp955b        |
| chr17 | 47980000  | 47996999  | 126.69 | 148.11  | 151.94  | 168.95  | 171.55  | 168   | 0.86 | 0.9  | 1.02 | Mdfi, Foxp4           |
| chr17 | 84000000  | 84011999  | 81.15  | 91.67   | 78.09   | 89.18   | 81.49   | 82    | 0.89 | 0.88 | 0.99 | Cox7a2l1, Kcng3       |
| chr17 | 7821000   | 7825999   | 60.17  | 76.06   | 84.03   | 89.93   | 120.62  | 117.2 | 0.79 | 0.93 | 1.03 | Gm9992, Fndc1         |
| chr17 | 30533000  | 30536999  | 37.26  | 51.64   | 36.5    | 39.51   | 40.21   | 39.2  | 0.72 | 0.92 | 1.03 | Btbd9, Zfand3         |
| chr17 | 50432000  | 50433999  | 20.7   | 32.83   | 27.16   | 38.38   | 24.12   | 30.4  | 0.63 | 0.71 | 0.79 | Dazl                  |
| chr17 | 66307000  | 66313999  | 77.01  | 120.49  | 117.98  | 141.86  | 116.33  | 120.8 | 0.64 | 0.83 | 0.96 | Twsg1, Ankrd12        |
| chr17 | 69182000  | 69182999  | 9.94   | 14.81   | 10.61   | 12.42   | 9.65    | 12.8  | 0.67 | 0.85 | 0.75 | Epb4.1l3, L3mbtl4     |
| chr17 | 71066000  | 71068999  | 32.57  | 46.44   | 38.62   | 43.65   | 45.03   | 44.4  | 0.7  | 0.88 | 1.01 | Tgif1, Dlgap1         |
| chr17 | 78989000  | 78995999  | 63.48  | 72.46   | 72.15   | 76.01   | 73.45   | 63.6  | 0.88 | 0.95 | 1.15 | Vit, Strn             |
| chr17 | 79823000  | 79826999  | 35.6   | 48.84   | 47.96   | 54.18   | 49.32   | 46.4  | 0.73 | 0.89 | 1.06 | Fam82a1, Cdc42ep3     |
| chr17 | 80364000  | 80370999  | 56.86  | 75.66   | 57.72   | 71.49   | 79.34   | 60.4  | 0.75 | 0.81 | 1.31 | Atl2, Hnrpll          |
| chr17 | 85595000  | 85599999  | 45.26  | 50.44   | 47.11   | 55.31   | 60.58   | 49.6  | 0.9  | 0.85 | 1.22 | Six3, 1700106N22Rik   |
| chr17 | 88241000  | 88243999  | 30.64  | 36.43   | 33.53   | 38.38   | 38.6    | 40    | 0.84 | 0.87 | 0.96 | Msh6, Kcnk12          |
| chr18 | 24322000  | 24330999  | 74.8   | 87.67   | 83.18   | 89.55   | 102.93  | 86    | 0.85 | 0.93 | 1.2  | Ino80c, Galnt1        |
| chr18 | 34130000  | 34156999  | 186.58 | 209.36  | 196.07  | 211.85  | 216.05  | 197.2 | 0.89 | 0.93 | 1.1  | D0H4S114, Epb4.1l4a   |
| chr18 | 60454000  | 60461999  | 51.34  | 61.25   | 65.36   | 73      | 64.33   | 73.2  | 0.84 | 0.9  | 0.88 | Iigp1, Gm4841         |
| chr18 | 65930000  | 65948999  | 165.33 | 203.76  | 176.98  | 187.76  | 191.92  | 177.2 | 0.81 | 0.94 | 1.08 | Sec11c, 5330437I02Rik |
| chr18 | 74670000  | 74679999  | 100.19 | 112.09  | 98.04   | 105.36  | 85.24   | 92.4  | 0.89 | 0.93 | 0.92 | Acaa2, Myo5b          |
| chr18 | 76503000  | 76521999  | 137.45 | 156.52  | 142.17  | 157.28  | 155.47  | 149.2 | 0.88 | 0.9  | 1.04 | Skor2, Smad2          |
| chr18 | 78969000  | 78976999  | 64.86  | 74.86   | 64.08   | 68.86   | 83.63   | 74.8  | 0.87 | 0.93 | 1.12 | Slc14a2, Setbp1       |
| chr18 | 85076000  | 85083999  | 61.27  | 70.05   | 61.54   | 70.74   | 64.33   | 62    | 0.87 | 0.87 | 1.04 | Fbxo15, Cyb5          |
| chr18 | 10856000  | 10860999  | 51.89  | 64.05   | 58.99   | 60.58   | 70.76   | 61.2  | 0.81 | 0.94 | 1.16 | Gata6, Mib1           |
| chr18 | 13127000  | 13132999  | 45.82  | 68.85   | 47.96   | 56.44   | 67.01   | 67.2  | 0.67 | 0.85 | 1    | Impact                |
| chr18 | 37678000  | 37682999  | 42.23  | 47.24   | 37.35   | 44.02   | 44.5    | 44.8  | 0.89 | 0.85 | 0.99 | Pcdhb22, Slc25a2      |
| chr18 | 61760000  | 61764999  | 67.9   | 90.47   | 84.03   | 89.55   | 91.14   | 86.8  | 0.75 | 0.94 | 1.05 | Il17b, Csnk1a1        |
| chr18 | 75949000  | 75953999  | 44.71  | 62.85   | 51.35   | 63.21   | 64.87   | 58    | 0.71 | 0.81 | 1.12 | Gm672, Zbtb7c         |
| chr18 | 81601000  | 81601999  | 8.28   | 10.81   | 6.37    | 8.28    | 6.97    | 8     | 0.77 | 0.77 | 0.87 | Sall3, Galr1          |
| chr18 | 83219000  | 83220999  | 23.74  | 29.22   | 20.8    | 23.33   | 19.3    | 27.2  | 0.81 | 0.89 | 0.71 | Zfp516                |
| chr19 | 30260000  | 30266999  | 50.23  | 58.05   | 56.87   | 66.6    | 64.87   | 52    | 0.87 | 0.85 | 1.25 | Mbl2, Glde            |
| chr19 | 37780000  | 37784999  | 47.47  | 58.05   | 62.39   | 68.11   | 77.2    | 68.4  | 0.82 | 0.92 | 1.13 | Cyp26a1, Myof         |
| chr19 | 55242000  | 55247999  | 46.92  | 61.25   | 59.42   | 63.59   | 64.33   | 54.4  | 0.77 | 0.93 | 1.18 | Gpam, Tectb           |
| chr19 | 37760000  | 37762999  | 52.72  | 65.65   | 55.6    | 66.98   | 83.1    | 75.2  | 0.8  | 0.83 | 1.1  | Cyp26a1, Cyp26c1      |
| chr19 | 56242000  | 56242999  | 11.59  | 14.01   | 14.43   | 15.43   | 23.05   | 8.4   | 0.83 | 0.94 | 2.74 | Habp2, Ppnr           |
| chr2  | 71038000  | 71042999  | 42.78  | 52.04   | 41.17   | 48.54   | 51.47   | 50.8  | 0.82 | 0.85 | 1.01 | Dync1i2, Cybrd1       |
| chr2  | 92693000  | 92804999  | 927.65 | 1065.63 | 1128.06 | 1217.64 | 1164.94 | 1168  | 0.87 | 0.93 | 1    | Syt13, Chst1          |
| chr2  | 143911000 | 143932999 | 208.38 | 265.01  | 240.21  | 267.53  | 274.48  | 282   | 0.79 | 0.9  | 0.97 | Banf2, Snx5           |
| chr2  | 147061000 | 147065999 | 48.85  | 54.84   | 41.59   | 44.78   | 30.56   | 40.8  | 0.89 | 0.93 | 0.75 | Pax1, Nkx2-2          |
| chr2  | 166035000 | 166068999 | 299.74 | 335.46  | 345.46  | 369.88  | 327.02  | 318.4 | 0.89 | 0.93 | 1.03 | Sulf2, Prex1          |
| chr2  | 5137000   | 5158999   | 169.19 | 190.15  | 182.07  | 194.54  | 202.65  | 180   | 0.89 | 0.94 | 1.13 | Ccdc3, Camk1d         |
| chr2  | 52264000  | 52266999  | 42.5   | 60.85   | 65.78   | 71.49   | 62.19   | 89.6  | 0.7  | 0.92 | 0.69 | Neb, Arl5a            |
| chr2  | 70464000  | 70477999  | 113.99 | 129.7   | 124.77  | 136.21  | 151.18  | 121.2 | 0.88 | 0.92 | 1.25 | Gorasp2, Gad1         |
| chr2  | 74873000  | 74875999  | 28.7   | 32.83   | 23.34   | 26.34   | 23.05   | 33.6  | 0.87 | 0.89 | 0.69 | Hnrnpa3, Mtx2         |
| chr2  | 120960000 | 120965999 | 42.78  | 52.44   | 50.5    | 54.18   | 46.1    | 64    | 0.82 | 0.93 | 0.72 | Adal, Lcmt2           |
| chr2  | 127722000 | 127765999 | 329.83 | 375.09  | 362.44  | 420.3   | 380.09  | 386.8 | 0.88 | 0.86 | 0.98 | Bcl2l11, Acox1        |
| chr2  | 152337000 | 152351999 | 119.51 | 135.71  | 136.66  | 147.5   | 143.14  | 142.4 | 0.88 | 0.93 | 1.01 | Defb28                |

|      |           |           |        |        |        |        |        |       |      |      |      |                         |
|------|-----------|-----------|--------|--------|--------|--------|--------|-------|------|------|------|-------------------------|
| chr2 | 157377000 | 157389999 | 138.83 | 179.74 | 155.76 | 181.37 | 202.65 | 204.8 | 0.77 | 0.86 | 0.99 | Peg5, Nnat              |
| chr2 | 165155000 | 165168999 | 98.53  | 125.3  | 97.61  | 112.51 | 117.41 | 121.6 | 0.79 | 0.87 | 0.97 | Elmo2, Zfp663           |
| chr2 | 5654000   | 5658999   | 49.96  | 57.64  | 58.99  | 73.37  | 65.4   | 65.2  | 0.87 | 0.8  | 1    | Camk1d, Cdc123          |
| chr2 | 9803000   | 9813999   | 101.29 | 125.7  | 125.62 | 133.58 | 131.34 | 135.2 | 0.81 | 0.94 | 0.97 | Gata3, Taf3             |
| chr2 | 49824000  | 49835999  | 81.42  | 90.87  | 95.49  | 102.72 | 96.5   | 90    | 0.9  | 0.93 | 1.07 | Lypd6, Lypd6b           |
| chr2 | 52271000  | 52274999  | 38.92  | 51.64  | 54.32  | 58.32  | 62.72  | 56.4  | 0.75 | 0.93 | 1.11 | Neb, Arl5a              |
| chr2 | 59156000  | 59157999  | 23.74  | 44.03  | 31.41  | 33.11  | 33.77  | 40.8  | 0.54 | 0.95 | 0.83 | Dapl1, Pkp4             |
| chr2 | 61641000  | 61650999  | 87.22  | 97.68  | 115.44 | 121.91 | 119.55 | 110.8 | 0.89 | 0.95 | 1.08 | Slc4a10, Tbr1           |
| chr2 | 70256000  | 70265999  | 79.49  | 88.47  | 85.73  | 97.83  | 84.17  | 78.8  | 0.9  | 0.88 | 1.07 | Sp5, Myo3b              |
| chr2 | 73784000  | 73784999  | 9.38   | 11.61  | 8.49   | 11.29  | 10.19  | 7.2   | 0.81 | 0.75 | 1.41 | Atp5g3, Lnp             |
| chr2 | 74944000  | 74944999  | 8.56   | 10.81  | 8.06   | 8.65   | 6.43   | 10    | 0.79 | 0.93 | 0.64 | Hnrnpa3, Mtx2           |
| chr2 | 77816000  | 77820999  | 51.34  | 58.85  | 49.66  | 61.71  | 60.04  | 51.6  | 0.87 | 0.8  | 1.16 | Ube2e3, Cwc22           |
| chr2 | 80283000  | 80284999  | 25.12  | 30.82  | 23.77  | 32.74  | 27.88  | 31.2  | 0.81 | 0.73 | 0.89 | Frzb, Dnajc10           |
| chr2 | 93423000  | 93427999  | 32.57  | 40.03  | 32.25  | 35.75  | 39.14  | 39.2  | 0.81 | 0.9  | 1    | Cd82, Alx4              |
| chr2 | 103811000 | 103813999 | 26.5   | 31.22  | 36.5   | 39.89  | 38.06  | 36.8  | 0.85 | 0.92 | 1.03 | Fbxo3, Lmo2             |
| chr2 | 104990000 | 104990999 | 9.11   | 13.21  | 8.06   | 11.29  | 11.26  | 11.6  | 0.69 | 0.71 | 0.97 | 0610012H03Rik, Wt1      |
| chr2 | 165243000 | 165243999 | 8.56   | 10.41  | 10.61  | 11.66  | 8.58   | 12.8  | 0.82 | 0.91 | 0.67 | 4833422F24Rik, Slc13a3  |
| chr2 | 170353000 | 170357999 | 48.3   | 57.24  | 42.44  | 45.91  | 50.39  | 53.2  | 0.84 | 0.92 | 0.95 | Dok5, Pfdn4             |
| chr3 | 35141000  | 35150999  | 60.45  | 70.85  | 66.21  | 77.89  | 58.43  | 70.4  | 0.85 | 0.85 | 0.83 | Atp11b, Sox2            |
| chr3 | 36251000  | 36258999  | 55.48  | 77.26  | 64.51  | 68.11  | 68.08  | 69.6  | 0.72 | 0.95 | 0.98 | Qrfpr, Anxa5            |
| chr3 | 51004000  | 51023999  | 168.09 | 207.36 | 209.65 | 243.83 | 204.25 | 219.6 | 0.81 | 0.86 | 0.93 | Slc7a11, Ccrr4l         |
| chr3 | 57705000  | 57730999  | 182.44 | 202.96 | 197.35 | 223.89 | 195.68 | 190.4 | 0.9  | 0.88 | 1.03 | Tsc22d2, Pfn2           |
| chr3 | 57741000  | 57754999  | 88.87  | 103.68 | 99.31  | 109.12 | 124.37 | 116   | 0.86 | 0.91 | 1.07 | Tsc22d2, Pfn2           |
| chr3 | 82900000  | 82919999  | 158.15 | 192.55 | 167.21 | 179.49 | 166.19 | 205.6 | 0.82 | 0.93 | 0.81 | Sfrp2, Plrg1            |
| chr3 | 87055000  | 87066999  | 97.43  | 109.28 | 97.61  | 107.24 | 96.5   | 91.6  | 0.89 | 0.91 | 1.05 | Kirrel, Ferls           |
| chr3 | 87383000  | 87393999  | 85.29  | 98.88  | 79.36  | 98.21  | 93.82  | 79.6  | 0.86 | 0.81 | 1.18 | Arhgef11, Etv3          |
| chr3 | 98081000  | 98100999  | 147.66 | 171.33 | 155.76 | 164.81 | 171.55 | 158.4 | 0.86 | 0.95 | 1.08 | Hmgcs2, Phgdh           |
| chr3 | 104005000 | 104005999 | 18.77  | 23.62  | 18.25  | 25.21  | 25.2   | 20.8  | 0.79 | 0.72 | 1.21 | Magi3, Phtf1            |
| chr3 | 131415000 | 131416999 | 28.43  | 34.83  | 28.86  | 32.74  | 38.6   | 30.8  | 0.82 | 0.88 | 1.25 | Dkk2, Papss1            |
| chr3 | 138305000 | 138325999 | 166.16 | 202.56 | 204.56 | 230.66 | 229.45 | 213.2 | 0.82 | 0.89 | 1.08 | Tspan5, Eif4e           |
| chr3 | 152533000 | 152540999 | 81.42  | 95.67  | 63.66  | 77.51  | 67.55  | 66    | 0.85 | 0.82 | 1.02 | St6galnac5, Pigk        |
| chr3 | 8639000   | 8646999   | 66.24  | 78.06  | 73     | 91.44  | 72.91  | 67.6  | 0.85 | 0.8  | 1.08 | Hey1, Stmn2             |
| chr3 | 37989000  | 37991999  | 30.08  | 42.03  | 36.92  | 39.89  | 44.5   | 46    | 0.72 | 0.93 | 0.97 | Gm5148, Ankrd50         |
| chr3 | 52221000  | 52226999  | 48.85  | 66.45  | 56.02  | 60.96  | 78.27  | 67.6  | 0.74 | 0.92 | 1.16 | Foxo1, Cog6             |
| chr3 | 66774000  | 66778999  | 42.23  | 60.85  | 52.63  | 63.97  | 51.47  | 54    | 0.69 | 0.82 | 0.95 | Veph1, Shox2            |
| chr3 | 88549000  | 88553999  | 61.83  | 68.85  | 66.21  | 85.42  | 71.3   | 73.6  | 0.9  | 0.78 | 0.97 | Syt11, Rit1             |
| chr3 | 98223000  | 98234999  | 108.19 | 184.94 | 151.94 | 167.82 | 180.13 | 179.2 | 0.59 | 0.91 | 1.01 | Zfp697, Hsd3b4          |
| chr3 | 105658000 | 105658999 | 7.45   | 8.81   | 4.67   | 7.53   | 6.97   | 8     | 0.85 | 0.62 | 0.87 | Rap1a, Adora3           |
| chr3 | 129174000 | 129178999 | 46.09  | 66.45  | 50.93  | 59.83  | 57.9   | 40.8  | 0.69 | 0.85 | 1.42 | Enpep, Elovl6           |
| chr3 | 138749000 | 138750999 | 21.8   | 29.22  | 24.19  | 29.73  | 27.88  | 28    | 0.75 | 0.81 | 1    | B930007M17Rik, Rap1gds1 |
| chr3 | 146541000 | 146546999 | 48.85  | 64.85  | 58.99  | 67.35  | 80.95  | 67.6  | 0.75 | 0.88 | 1.2  | Ttll7                   |
| chr4 | 129879000 | 129894999 | 138    | 154.92 | 132.84 | 159.54 | 122.23 | 145.6 | 0.89 | 0.83 | 0.84 | Tinagl1, Gm853          |
| chr4 | 150062000 | 150080999 | 204.52 | 244.19 | 230.45 | 250.23 | 247.68 | 221.6 | 0.84 | 0.92 | 1.12 | Errfi1, Slc45a1         |
| chr4 | 33040000  | 33086999  | 338.38 | 389.5  | 402.33 | 452.66 | 457.83 | 471.6 | 0.87 | 0.89 | 0.97 | Ankrd6, Rragd           |
| chr4 | 46847000  | 46863999  | 141.59 | 164.13 | 151.09 | 168.2  | 159.22 | 156.4 | 0.86 | 0.9  | 1.02 | Tbcd2, Gabbr2           |
| chr4 | 57863000  | 57873999  | 143.25 | 168.93 | 144.72 | 188.89 | 159.22 | 159.6 | 0.85 | 0.77 | 1    | Akap2, D630039A03Rik    |
| chr4 | 117079000 | 117135999 | 456.24 | 514.8  | 491.03 | 529.05 | 567.19 | 484.8 | 0.89 | 0.93 | 1.17 | Rnf220, Tmem53          |
| chr4 | 117981000 | 118006999 | 229.91 | 261.8  | 305.57 | 325.11 | 355.97 | 345.6 | 0.88 | 0.94 | 1.03 | Hyi, Ptprf              |
| chr4 | 119074000 | 119083999 | 72.59  | 102.48 | 80.64  | 91.06  | 92.74  | 97.2  | 0.71 | 0.89 | 0.95 | Ppih, Ccdc30            |
| chr4 | 128550000 | 128567999 | 135.52 | 152.92 | 168.91 | 185.88 | 166.19 | 162.8 | 0.89 | 0.91 | 1.02 | Trim62                  |
| chr4 | 140812000 | 140826999 | 123.93 | 160.12 | 145.15 | 170.83 | 169.94 | 173.2 | 0.77 | 0.85 | 0.98 | Epha2, Arhgef19         |
| chr4 | 145661000 | 145677999 | 154.56 | 181.34 | 150.24 | 161.8  | 150.11 | 154.8 | 0.85 | 0.93 | 0.97 | Gm13251, Gm13242        |

|      |           |           |        |        |        |        |        |       |      |      |      |                              |
|------|-----------|-----------|--------|--------|--------|--------|--------|-------|------|------|------|------------------------------|
| chr4 | 33953000  | 33955999  | 32.84  | 45.24  | 30.13  | 37.25  | 41.28  | 33.6  | 0.73 | 0.81 | 1.23 | Cnr1, Rngtt                  |
| chr4 | 43632000  | 43639999  | 65.41  | 88.47  | 73.85  | 80.9   | 98.11  | 76    | 0.74 | 0.91 | 1.29 | Msmg, Npr2                   |
| chr4 | 47111000  | 47111999  | 6.62   | 11.61  | 10.19  | 12.04  | 8.58   | 13.2  | 0.57 | 0.85 | 0.65 | Col15a1, Galnt12             |
| chr4 | 53217000  | 53226999  | 66.24  | 77.26  | 65.78  | 76.76  | 64.87  | 75.2  | 0.86 | 0.86 | 0.86 | Slc44a1, Abca1               |
| chr4 | 57041000  | 57044999  | 33.67  | 38.83  | 34.38  | 43.65  | 41.28  | 33.2  | 0.87 | 0.79 | 1.24 | 6430704M03Rik,<br>Epb4.114b  |
| chr4 | 57035000  | 57036999  | 13.8   | 21.22  | 19.95  | 23.71  | 19.84  | 20.4  | 0.65 | 0.84 | 0.97 | 6430704M03Rik,<br>Epb4.114b  |
| chr4 | 58159000  | 58161999  | 29.53  | 47.64  | 42.44  | 45.15  | 47.71  | 34.4  | 0.62 | 0.94 | 1.39 | Txndc8, Svep1                |
| chr4 | 98644000  | 98646999  | 33.95  | 48.84  | 51.78  | 55.31  | 47.71  | 38.8  | 0.7  | 0.94 | 1.23 | Angptl3, Usp1                |
| chr4 | 111166000 | 111171999 | 53.27  | 59.25  | 44.14  | 50.42  | 45.57  | 55.2  | 0.9  | 0.88 | 0.83 | Spata6, Bend5                |
| chr4 | 121689000 | 121696999 | 87.22  | 98.08  | 84.88  | 92.56  | 64.87  | 77.2  | 0.89 | 0.92 | 0.84 | 9530002B09Rik,<br>Gm12887    |
| chr5 | 21495000  | 21497999  | 31.46  | 37.23  | 30.98  | 32.74  | 35.92  | 32    | 0.85 | 0.95 | 1.12 | Slc26a5, Reln                |
| chr5 | 23195000  | 23215999  | 158.43 | 194.15 | 167.64 | 192.28 | 167.26 | 161.2 | 0.82 | 0.87 | 1.04 | Srpk2,<br>ENSMUSG00000073777 |
| chr5 | 100532000 | 100535999 | 28.7   | 33.63  | 24.62  | 30.48  | 25.73  | 28.8  | 0.85 | 0.81 | 0.89 | Tmem150c, Enoph1             |
| chr5 | 144834000 | 144847999 | 94.39  | 117.69 | 104.83 | 111    | 114.19 | 107.6 | 0.8  | 0.94 | 1.06 | Ocm, Lmtk2                   |
| chr5 | 20460000  | 20471999  | 88.32  | 110.09 | 98.89  | 112.51 | 130.27 | 116.4 | 0.8  | 0.88 | 1.12 | Rsbm11, Ptpn14               |
| chr5 | 27735000  | 27741999  | 46.64  | 53.24  | 54.32  | 57.95  | 65.94  | 59.6  | 0.88 | 0.94 | 1.11 | Speer4b, Dpp6                |
| chr5 | 33387000  | 33392999  | 51.89  | 60.05  | 57.29  | 60.96  | 69.69  | 63.6  | 0.86 | 0.94 | 1.1  | Slc5a1, Ywhah                |
| chr5 | 65288000  | 65293999  | 51.34  | 66.85  | 54.75  | 78.27  | 68.62  | 74    | 0.77 | 0.7  | 0.93 | Tlr1, Klf3                   |
| chr5 | 67272000  | 67283999  | 94.95  | 112.09 | 100.16 | 103.48 | 105.61 | 103.2 | 0.85 | 0.95 | 1.02 | Limch1, Phox2b               |
| chr5 | 72957000  | 72961999  | 45.26  | 57.24  | 42.86  | 50.42  | 52     | 44.8  | 0.79 | 0.85 | 1.16 | Nfx11, Zar1                  |
| chr5 | 110556000 | 110562999 | 63.48  | 89.67  | 75.97  | 85.04  | 102.39 | 70    | 0.71 | 0.89 | 1.46 | Chfr, Zfp605                 |
| chr5 | 120104000 | 120117999 | 136.35 | 154.12 | 157.45 | 168.57 | 136.71 | 136   | 0.88 | 0.93 | 1.01 | Tbx3                         |
| chr5 | 127171000 | 127175999 | 37.54  | 48.04  | 39.47  | 44.78  | 28.95  | 31.2  | 0.78 | 0.88 | 0.93 | Tmem132c                     |
| chr5 | 137283000 | 137312999 | 237.92 | 269.81 | 288.59 | 320.97 | 330.24 | 335.2 | 0.88 | 0.9  | 0.99 | Emid2, Myl10                 |
| chr5 | 144718000 | 144722999 | 55.75  | 62.85  | 47.11  | 59.08  | 55.22  | 51.6  | 0.89 | 0.8  | 1.07 | RspH10b2, Ccz1               |
| chr5 | 150355000 | 150362999 | 77.28  | 91.67  | 75.12  | 80.52  | 87.92  | 78.8  | 0.84 | 0.93 | 1.12 | Wdr95, Hsph1                 |
| chr5 | 75383000  | 75393999  | 73.97  | 92.47  | 83.18  | 95.95  | 117.41 | 87.2  | 0.8  | 0.87 | 1.35 | Lnx1, Chic2                  |
| chr5 | 104602000 | 104606999 | 38.36  | 47.24  | 41.17  | 46.28  | 48.78  | 49.2  | 0.81 | 0.89 | 0.99 | Dmp1, Dspp                   |
| chr5 | 104943000 | 104949999 | 58.51  | 75.66  | 69.18  | 76.76  | 100.79 | 76    | 0.77 | 0.9  | 1.33 | BC005561, Zfp951             |
| chr5 | 106431000 | 106437999 | 61.83  | 68.85  | 54.75  | 61.71  | 54.15  | 55.6  | 0.9  | 0.89 | 0.97 | Zfp326, Barhl2               |
| chr5 | 106974000 | 106981999 | 72.04  | 80.86  | 60.69  | 70.74  | 48.25  | 60    | 0.89 | 0.86 | 0.8  | Barhl2, Zfp644               |
| chr5 | 119312000 | 119321999 | 109.85 | 125.7  | 114.59 | 126.81 | 120.62 | 121.2 | 0.87 | 0.9  | 1    | Tbx3, Med13l                 |
| chr5 | 126310000 | 126318999 | 81.42  | 95.27  | 76.82  | 81.65  | 61.65  | 71.2  | 0.85 | 0.94 | 0.87 | Tmem132b                     |
| chr5 | 126425000 | 126433999 | 87.77  | 100.88 | 86.58  | 94.45  | 69.16  | 76.4  | 0.87 | 0.92 | 0.91 | Tmem132b                     |
| chr5 | 131336000 | 131339999 | 40.85  | 45.64  | 39.89  | 44.78  | 37.53  | 36    | 0.9  | 0.89 | 1.04 | A330070K13Rik,<br>Wbscr17    |
| chr5 | 135730000 | 135732999 | 35.33  | 41.63  | 34.38  | 39.13  | 53.61  | 47.6  | 0.85 | 0.88 | 1.13 | Fzd9                         |
| chr5 | 148538000 | 148551999 | 123.65 | 146.91 | 145.57 | 158.41 | 136.71 | 132.8 | 0.84 | 0.92 | 1.03 | Pomp, Flt1                   |
| chr5 | 150702000 | 150702999 | 6.35   | 8.01   | 7.64   | 12.42  | 9.65   | 7.2   | 0.79 | 0.62 | 1.34 | Rxfp2, B3galtl               |
| chr6 | 145613000 | 145630999 | 150.42 | 180.14 | 165.94 | 175.72 | 185.49 | 183.2 | 0.84 | 0.94 | 1.01 | Rassf8, Tuba3b               |
| chr6 | 37630000  | 37638999  | 76.73  | 88.47  | 81.49  | 90.31  | 98.64  | 85.2  | 0.87 | 0.9  | 1.16 | Atp6v0c, Akr1d1              |
| chr6 | 37822000  | 37830999  | 98.26  | 126.9  | 139.2  | 147.5  | 137.78 | 118.8 | 0.77 | 0.94 | 1.16 | Trim24, Svopl                |
| chr6 | 87389000  | 87405999  | 115.37 | 135.71 | 125.62 | 139.6  | 133.49 | 148.4 | 0.85 | 0.9  | 0.9  | Bmp10, Arhgap25              |
| chr6 | 87638000  | 87668999  | 240.68 | 273.01 | 247.43 | 298.77 | 292.17 | 276   | 0.88 | 0.83 | 1.06 | Aplf, Ccde48                 |
| chr6 | 117257000 | 117270999 | 108.19 | 132.9  | 137.51 | 154.27 | 127.59 | 136   | 0.81 | 0.89 | 0.94 | Zfp637, Cxcl12               |
| chr6 | 144816000 | 144819999 | 35.88  | 42.43  | 30.56  | 34.99  | 38.06  | 42.4  | 0.85 | 0.87 | 0.9  | Sox5, Beat1                  |
| chr6 | 8570000   | 8572999   | 29.81  | 36.83  | 36.5   | 44.02  | 47.18  | 44.4  | 0.81 | 0.83 | 1.06 | Glicc1, Ica1                 |
| chr6 | 28887000  | 28892999  | 37.26  | 47.64  | 42.86  | 46.28  | 56.29  | 44    | 0.78 | 0.93 | 1.28 | Lep, Lrrc4                   |
| chr6 | 31593000  | 31594999  | 14.35  | 17.21  | 17.4   | 18.44  | 16.62  | 19.2  | 0.83 | 0.94 | 0.87 | 1700012A03Rik, Podxl         |

|      |           |           |        |        |        |        |        |       |      |      |      |                       |
|------|-----------|-----------|--------|--------|--------|--------|--------|-------|------|------|------|-----------------------|
| chr6 | 37685000  | 37690999  | 41.4   | 51.24  | 55.17  | 59.83  | 42.89  | 42    | 0.81 | 0.92 | 1.02 | Atp6v0c, Akr1d1       |
| chr6 | 52152000  | 52156999  | 87.49  | 107.68 | 102.28 | 114.01 | 85.78  | 92    | 0.81 | 0.9  | 0.93 | Hoxa4                 |
| chr6 | 85074000  | 85077999  | 47.75  | 56.84  | 47.53  | 54.18  | 55.75  | 44.8  | 0.84 | 0.88 | 1.24 | Gm5878                |
| chr6 | 118379000 | 118380999 | 26.5   | 40.03  | 40.74  | 43.27  | 58.97  | 55.2  | 0.66 | 0.94 | 1.07 | Bms1, Zfp248          |
| chr6 | 136391000 | 136393999 | 30.91  | 41.23  | 29.28  | 40.64  | 41.28  | 37.6  | 0.75 | 0.72 | 1.1  | Atf7ip, LOC100502936  |
| chr6 | 142830000 | 142833999 | 27.05  | 35.63  | 25.89  | 37.25  | 40.21  | 22.8  | 0.76 | 0.69 | 1.76 | Gm766, St8sia1        |
| chr6 | 143314000 | 143316999 | 40.02  | 50.04  | 41.59  | 46.28  | 43.96  | 36    | 0.8  | 0.9  | 1.22 | Etnk1, Sox5           |
| chr6 | 144433000 | 144437999 | 40.85  | 48.44  | 39.89  | 49.29  | 50.93  | 39.2  | 0.84 | 0.81 | 1.3  | Sox5, Beat1           |
| chr6 | 144452000 | 144452999 | 8.56   | 10.41  | 7.64   | 9.41   | 8.04   | 7.6   | 0.82 | 0.81 | 1.06 | Sox5, Beat1           |
| chr7 | 122550000 | 122572999 | 191.27 | 212.97 | 179.95 | 198.3  | 154.93 | 169.2 | 0.9  | 0.91 | 0.92 | Sox6, Insc            |
| chr7 | 19447000  | 19453999  | 65.41  | 73.26  | 65.36  | 69.24  | 83.63  | 60.4  | 0.89 | 0.94 | 1.38 | Pglyrp1, Mill2        |
| chr7 | 28766000  | 28776999  | 118.41 | 166.53 | 140.05 | 155.03 | 173.16 | 162   | 0.71 | 0.9  | 1.07 | Zfp780b, Psmc4        |
| chr7 | 29047000  | 29052999  | 49.96  | 68.45  | 65.36  | 75.26  | 60.04  | 58    | 0.73 | 0.87 | 1.04 | Eid2                  |
| chr7 | 29457000  | 29462999  | 43.06  | 59.65  | 53.47  | 63.97  | 69.69  | 71.2  | 0.72 | 0.84 | 0.98 | C330005M16Rik, Fbxo27 |
| chr7 | 31539000  | 31540999  | 29.53  | 35.23  | 25.04  | 30.85  | 29.49  | 31.2  | 0.84 | 0.81 | 0.95 | Dmkn, Sbsn            |
| chr7 | 89436000  | 89440999  | 50.51  | 62.45  | 52.63  | 58.32  | 57.9   | 54.8  | 0.81 | 0.9  | 1.06 | Adamts13, Sh3gl3      |
| chr7 | 108962000 | 108969999 | 66.52  | 87.67  | 64.51  | 81.65  | 80.95  | 89.2  | 0.76 | 0.79 | 0.91 | Phox2a                |
| chr7 | 145161000 | 145171999 | 103.78 | 116.09 | 84.03  | 102.35 | 71.3   | 86.4  | 0.89 | 0.82 | 0.83 | Tcerg11, Glrx3        |
| chr7 | 145307000 | 145320999 | 138.28 | 158.92 | 105.68 | 125.68 | 99.71  | 116.4 | 0.87 | 0.84 | 0.86 | Tcerg11, Glrx3        |
| chr7 | 145420000 | 145426999 | 61.55  | 71.66  | 59.42  | 74.88  | 49.86  | 66    | 0.86 | 0.79 | 0.76 | Tcerg11, Glrx3        |
| chr7 | 149089000 | 149095999 | 46.64  | 53.64  | 54.75  | 61.71  | 61.12  | 58    | 0.87 | 0.89 | 1.05 | Tollip                |
| chr7 | 6264000   | 6269999   | 41.95  | 49.24  | 50.93  | 55.69  | 66.48  | 62.4  | 0.85 | 0.91 | 1.07 | Zfp583, Zfp667        |
| chr7 | 16539000  | 16543999  | 68.45  | 84.47  | 71.3   | 87.3   | 71.3   | 75.2  | 0.81 | 0.82 | 0.95 | Gltscr2, Ehd2         |
| chr7 | 26486000  | 26487999  | 25.94  | 29.62  | 32.68  | 31.61  | 35.92  | 38.8  | 0.88 | 0.89 | 0.93 | Tgfb2, Ccdc97         |
| chr7 | 28813000  | 28816999  | 44.99  | 53.64  | 46.68  | 56.07  | 54.68  | 49.2  | 0.84 | 0.83 | 1.11 | Zfp780b, Psmc4        |
| chr7 | 29475000  | 29487999  | 118.13 | 138.11 | 152.78 | 165.94 | 157.08 | 190.8 | 0.86 | 0.92 | 0.82 | Fbxo17, Fbxo27        |
| chr7 | 31257000  | 31259999  | 27.32  | 30.42  | 25.89  | 27.84  | 40.74  | 32.4  | 0.9  | 0.93 | 1.26 | Prodh2, Nphs1         |
| chr7 | 31837000  | 31837999  | 10.21  | 11.61  | 10.19  | 11.66  | 12.33  | 10.4  | 0.88 | 0.87 | 1.19 | Fxyd7                 |
| chr7 | 73502000  | 73509999  | 87.49  | 126.5  | 121.38 | 132.45 | 105.08 | 107.6 | 0.69 | 0.92 | 0.98 | Lrrk1, Chsy1          |
| chr7 | 74206000  | 74209999  | 32.84  | 41.23  | 25.89  | 28.97  | 36.99  | 38    | 0.8  | 0.89 | 0.97 | Lysmd4, Adamts17      |
| chr7 | 89446000  | 89451999  | 60.72  | 68.05  | 54.75  | 71.12  | 81.49  | 64    | 0.89 | 0.77 | 1.27 | Adamts13, Sh3gl3      |
| chr7 | 118360000 | 118367999 | 60.72  | 72.46  | 75.97  | 83.53  | 90.06  | 81.2  | 0.84 | 0.91 | 1.11 | Eif4g2, Galnt14       |
| chr7 | 120827000 | 120827999 | 8      | 10.01  | 4.67   | 7.53   | 11.79  | 5.6   | 0.8  | 0.62 | 2.11 | Spon1, Far1           |
| chr7 | 122532000 | 122533999 | 16.01  | 20.42  | 14.43  | 16.56  | 11.26  | 21.2  | 0.78 | 0.87 | 0.53 | Sox6, Insc            |
| chr7 | 124398000 | 124398999 | 11.32  | 14.41  | 10.19  | 12.04  | 8.04   | 6.4   | 0.79 | 0.85 | 1.26 | Xylt1, Nubc2          |
| chr7 | 143368000 | 143372999 | 46.37  | 51.64  | 44.14  | 50.8   | 47.71  | 50.8  | 0.9  | 0.87 | 0.94 | Mgmt, Mki67           |
| chr7 | 149296000 | 149305999 | 70.38  | 84.07  | 66.21  | 77.51  | 75.59  | 62    | 0.84 | 0.85 | 1.22 | Dusp8, Krtap5-2       |
| chr8 | 10479000  | 10488999  | 61.55  | 77.26  | 58.57  | 65.47  | 79.88  | 67.2  | 0.8  | 0.89 | 1.19 | Myo16, Irs2           |
| chr8 | 127007000 | 127014999 | 58.51  | 67.25  | 64.08  | 70.36  | 66.48  | 63.6  | 0.87 | 0.91 | 1.05 | Pgbd5, Cog2           |
| chr8 | 27363000  | 27384999  | 151.25 | 186.95 | 165.52 | 182.5  | 169.41 | 173.6 | 0.81 | 0.91 | 0.98 | Zfp703, Thap1         |
| chr8 | 27432000  | 27454999  | 211.14 | 248.19 | 227.48 | 249.47 | 205.86 | 208.8 | 0.85 | 0.91 | 0.99 | Zfp703, Thap1         |
| chr8 | 46093000  | 46115999  | 237.09 | 292.63 | 224.93 | 293.87 | 239.64 | 229.6 | 0.81 | 0.77 | 1.04 | Mtnr1a, Fat1          |
| chr8 | 46120000  | 46129999  | 95.5   | 108.48 | 75.97  | 106.49 | 82.56  | 88.4  | 0.88 | 0.71 | 0.93 | Mtnr1a, Fat1          |
| chr8 | 47361000  | 47366999  | 49.13  | 56.04  | 50.08  | 53.06  | 63.26  | 58    | 0.88 | 0.94 | 1.09 | Slc25a4, Helt         |
| chr8 | 63913000  | 63923999  | 80.04  | 96.47  | 89.97  | 98.59  | 107.22 | 100   | 0.83 | 0.91 | 1.07 | Cbr4, Sh3rf1          |
| chr8 | 85553000  | 85561999  | 72.87  | 93.27  | 70.88  | 77.14  | 69.16  | 65.6  | 0.78 | 0.92 | 1.05 | Tbc1d9, Rnf150        |
| chr8 | 85917000  | 85918999  | 10.21  | 14.81  | 10.61  | 17.31  | 14.47  | 17.6  | 0.69 | 0.61 | 0.82 | Clgn, Scoc            |
| chr8 | 112797000 | 112803999 | 59.89  | 74.46  | 56.45  | 63.59  | 50.93  | 58    | 0.8  | 0.89 | 0.88 | Vac14, Hydin          |
| chr8 | 14592000  | 14597999  | 59.62  | 68.85  | 61.54  | 67.73  | 71.3   | 71.2  | 0.87 | 0.91 | 1    | Cln8, Dlgap2          |
| chr8 | 27007000  | 27016999  | 67.62  | 79.26  | 76.39  | 85.04  | 85.78  | 76    | 0.85 | 0.9  | 1.13 | Kcnu1, Hgsnat         |
| chr8 | 37488000  | 37490999  | 21.8   | 24.42  | 27.59  | 31.61  | 33.77  | 23.6  | 0.89 | 0.87 | 1.43 | Lonrf1, 6430573F11Rik |
| chr8 | 48121000  | 48125999  | 40.57  | 46.84  | 36.92  | 46.66  | 43.96  | 37.2  | 0.87 | 0.79 | 1.18 | Enpp6, Stox2          |
| chr8 | 80617000  | 80619999  | 26.5   | 31.22  | 25.89  | 31.23  | 28.41  | 22.4  | 0.85 | 0.83 | 1.27 | Ednra, Ttc29          |

|      |           |           |        |        |        |        |        |       |      |      |      |                              |
|------|-----------|-----------|--------|--------|--------|--------|--------|-------|------|------|------|------------------------------|
| chr8 | 83478000  | 83479999  | 20.98  | 26.02  | 17.82  | 20.7   | 23.05  | 16.8  | 0.81 | 0.86 | 1.37 | Gab1, Usp38                  |
| chr8 | 87070000  | 87074999  | 42.5   | 47.24  | 40.32  | 45.91  | 42.35  | 46    | 0.9  | 0.88 | 0.92 | Ier2, Cacna1a                |
| chr8 | 94883000  | 94891999  | 137.73 | 198.55 | 154.48 | 182.5  | 136.71 | 180.8 | 0.69 | 0.85 | 0.76 | Irx6, Irx5                   |
| chr8 | 111316000 | 111319999 | 63.48  | 73.26  | 58.57  | 66.98  | 86.31  | 82.4  | 0.87 | 0.87 | 1.05 | Pmfbp1, Zfhx3                |
| chr8 | 114169000 | 114178999 | 71.76  | 93.67  | 87     | 91.81  | 114.19 | 116.8 | 0.77 | 0.95 | 0.98 | Zfp1, Ctrb1                  |
| chr8 | 128184000 | 128185999 | 14.08  | 19.21  | 15.28  | 17.69  | 20.91  | 18.4  | 0.73 | 0.86 | 1.14 | Sipa1l2, 4933403G14Rik       |
| chr9 | 27069000  | 27085999  | 117.3  | 134.9  | 118.41 | 126.81 | 113.12 | 111.2 | 0.87 | 0.93 | 1.02 | Jam3, Igsf9b                 |
| chr9 | 40330000  | 40342999  | 114.82 | 136.51 | 124.77 | 137.34 | 122.23 | 124   | 0.84 | 0.91 | 0.99 | 9030425E11Rik, Gramd1b       |
| chr9 | 121392000 | 121407999 | 125.03 | 139.71 | 129.87 | 158.41 | 158.69 | 146   | 0.89 | 0.82 | 1.09 | Cck, Trak1                   |
| chr9 | 20241000  | 20243999  | 50.23  | 60.85  | 63.24  | 67.35  | 57.9   | 53.2  | 0.83 | 0.94 | 1.09 | Zfp560, Zfp26                |
| chr9 | 22010000  | 22010999  | 10.49  | 14.41  | 9.76   | 11.29  | 17.16  | 13.2  | 0.73 | 0.86 | 1.3  | Zfp809, Zfp872               |
| chr9 | 34625000  | 34625999  | 7.45   | 8.81   | 8.49   | 9.78   | 6.97   | 8     | 0.85 | 0.87 | 0.87 | St3gal4, Kirrel3             |
| chr9 | 40589000  | 40590999  | 28.43  | 36.43  | 29.71  | 39.51  | 30.02  | 33.6  | 0.78 | 0.75 | 0.89 | Hspa8, 9030425E11Rik         |
| chr9 | 41832000  | 41835999  | 28.43  | 36.03  | 32.68  | 34.99  | 31.09  | 30.4  | 0.79 | 0.93 | 1.02 | Ubash3b, Sorl1               |
| chr9 | 42747000  | 42747999  | 6.9    | 8.41   | 7.21   | 7.9    | 7.51   | 7.6   | 0.82 | 0.91 | 0.99 | Tbcel, Grik4                 |
| chr9 | 51708000  | 51715999  | 66.79  | 75.26  | 66.63  | 71.12  | 88.99  | 65.2  | 0.89 | 0.94 | 1.36 | Fdx1, Arhgap20               |
| chr9 | 60003000  | 60003999  | 10.49  | 12.01  | 8.06   | 8.65   | 8.58   | 7.2   | 0.87 | 0.93 | 1.19 | Thsd4, Thsd4                 |
| chr9 | 69016000  | 69020999  | 33.95  | 38.83  | 33.1   | 38.76  | 33.77  | 36    | 0.87 | 0.85 | 0.94 | Narg2, Rora                  |
| chr9 | 77518000  | 77520999  | 32.29  | 37.23  | 33.95  | 36.12  | 45.57  | 42.8  | 0.87 | 0.94 | 1.06 | Gclc, Khlh31                 |
| chr9 | 98784000  | 98785999  | 30.36  | 40.43  | 33.53  | 39.51  | 20.37  | 31.2  | 0.75 | 0.85 | 0.65 | 7420426K07Rik, 2410012M07Rik |
| chr9 | 100994000 | 101000999 | 48.02  | 62.45  | 51.78  | 61.71  | 61.65  | 64.8  | 0.77 | 0.84 | 0.95 | Msl2, Ppp2r3a                |
| chr9 | 103777000 | 103783999 | 48.85  | 62.45  | 47.96  | 57.57  | 57.9   | 47.6  | 0.78 | 0.83 | 1.22 | Nphp3, Tmem108               |
| chr9 | 108726000 | 108737999 | 122.55 | 154.52 | 151.09 | 174.59 | 171.55 | 160.8 | 0.79 | 0.87 | 1.07 | Slc26a6, Celsr3              |
| chr9 | 110578000 | 110582999 | 67.62  | 78.06  | 78.94  | 96.7   | 91.67  | 75.6  | 0.87 | 0.82 | 1.21 | Ccdc12, Pth1r                |
| chr9 | 114019000 | 114024999 | 54.93  | 65.25  | 68.33  | 84.29  | 68.08  | 80    | 0.84 | 0.81 | 0.85 | Bcl2a1c, Fbxl2               |
| chr9 | 116400000 | 116404999 | 44.16  | 49.24  | 53.47  | 45.91  | 55.75  | 42    | 0.9  | 0.9  | 1.33 | Tgfbr2                       |
| chr9 | 119761000 | 119761999 | 10.49  | 12.41  | 8.06   | 10.16  | 11.79  | 6.4   | 0.85 | 0.79 | 1.84 | Wdr48, Scn11a                |
| chr9 | 122493000 | 122499999 | 64.59  | 74.86  | 51.35  | 65.85  | 54.15  | 68.8  | 0.86 | 0.78 | 0.79 | Gm9524, Abhd5                |
| chr9 | 123259000 | 123261999 | 37.54  | 50.04  | 40.32  | 51.55  | 64.33  | 48.4  | 0.75 | 0.78 | 1.33 | Tmem158, Lars2               |
| chrY | 1635000   | 1637999   | 63.48  | 70.85  | 44.56  | 53.81  | 40.21  | 47.2  | 0.9  | 0.83 | 0.85 | Gm6026, Zfy2                 |

**Table S6. Characteristics of the patient muscle biopsies used for mRNA profiling.** EDMD-AD (n=3), EDMD-XR (n=4) and FPLD (n=7) muscle biopsies are shown in the table. Genes affected and the specific mutations for each patient are shown in last two columns.

| Sample ID | Diagnosis     | File Name [Profile] | Sex | Age | Gene        | Mutation                           |
|-----------|---------------|---------------------|-----|-----|-------------|------------------------------------|
| ED-L-2    | EDMD-AD       | HUD-EDMD-2aUA-s2    | F   | 2   | <i>LMNA</i> | c.IVS7-1G>T (c.1381G>T)            |
| ED-E-1    | EDMD-XR       | HUD-EDMD-3aUA-s2    | M   | 16  | <i>EMD</i>  | exon 4; 18 bp intronic duplication |
| ED-L-3    | EDMD-AD       | HUD-EDMD-4aUA-s2    | M   | 2   | <i>LMNA</i> | R249Y/+                            |
| ED-L-4    | EDMD-AD       | HUD-EDMD-5aUA-s2    | M   | 23  | <i>LMNA</i> | exon 4/+                           |
| ED-E-2    | EDMD-XR       | HUD-EDMD-6aUA-s2    | M   | 35  | <i>EMD</i>  | exon 6; g.1675-1678delTCCG         |
| ED-E-3    | EDMD-XR       | HUD-EDMD-7aUA-s2    | M   | 37  | <i>EMD</i>  | exon 6; g.1675-1678delTCCG         |
| ED-E-4    | EDMD-XR       | HUD-EDMD-8aUA-s2    | M   | 42  | <i>EMD</i>  | exon 6; g.1675-1678delTCCG         |
| FKRP-1a   | LGMD2I (FKRP) | HUD-FKRP-1aUA-s2    | F   | 14  | <i>FKRP</i> | L276I/L276I                        |
| FKRP-1b   | LGMD2I (FKRP) | HUD-FKRP-1bUA-s2    | F   | 14  | <i>FKRP</i> | L276I/L276I                        |
| FKRP-3    | LGMD2I (FKRP) | HUD-FKRP-3aUA-s2    | F   | 12  | <i>FKRP</i> | L276I/L276I                        |
| FKRP-6a   | LGMD2I (FKRP) | HUD-FKRP-6aUA-s2    | M   | 45  | <i>FKRP</i> | L276I/L276I                        |
| FKRP-6b   | LGMD2I (FKRP) | HUD-FKRP-6bUA-s2    | M   | 45  | <i>FKRP</i> | L276I/L276I                        |
| FKRP-7a   | LGMD2I (FKRP) | HUD-FKRP-7aUA-s2    | M   | 55  | <i>FKRP</i> | L276I/L276I                        |
| FKRP-7b   | LGMD2I (FKRP) | HUD-FKRP-7bUA-s2    | M   | 55  | <i>FKRP</i> | L276I/L276I                        |

**Table S7. ChIP-seq targets show up-regulation in muscle biopsies from EDMD patients.**

Shown in bold are the transcripts that show disease specific upregulation in EDMD. Red marked transcripts are shared between EDMD-XR and EDMD-AD.

| gene ID         | EDMD-XR      |         | FKRP   |          | gene ID         | EDMD-AD       |         | FKRP   |          |
|-----------------|--------------|---------|--------|----------|-----------------|---------------|---------|--------|----------|
|                 | FC           | FDR     | FC     | FDR      |                 | FC            | FDR     | FC     | FDR      |
| <i>ACTR3</i>    | <b>1.617</b> | 3.1E-03 | 1.368  | ns       | <i>ACTR3</i>    | <b>2.302</b>  | 5.2E-05 | 1.368  | ns       |
| <i>ADIPOQ</i>   | <b>7.255</b> | 1.0E-03 | 3.777  | ns       | <i>ADIPOQ</i>   | <b>10.788</b> | 1.8E-03 | 3.777  | ns       |
| <i>ANXA5</i>    | <b>1.723</b> | 1.8E-03 | 1.745  | ns       | <i>ANXA5</i>    | <b>2.694</b>  | 1.9E-04 | 1.745  | ns       |
| <i>CHIC2</i>    | <b>1.651</b> | 1.4E-05 | 1.043  | ns       | <i>CHIC2</i>    | <b>1.812</b>  | 5.3E-05 | 1.043  | ns       |
| <i>EHD2</i>     | <b>2.210</b> | 3.3E-04 | 1.242  | ns       | <i>EHD2</i>     | <b>3.431</b>  | 3.1E-04 | 1.242  | ns       |
| <i>GCLC</i>     | <b>1.607</b> | 1.1E-03 | -1.077 | ns       | <i>GCLC</i>     | <b>1.587</b>  | 5.2E-03 | -1.077 | ns       |
| <i>ID4</i>      | <b>1.532</b> | 2.1E-03 | 1.297  | ns       | <i>ID4</i>      | <b>1.678</b>  | 6.5E-04 | 1.297  | ns       |
| <i>KIF2A</i>    | <b>1.432</b> | 2.4E-03 | 1.124  | ns       | <i>KIF2A</i>    | <b>1.687</b>  | 5.3E-05 | 1.124  | ns       |
| <i>MBIP</i>     | <b>1.384</b> | 5.6E-04 | -1.105 | ns       | <i>MBIP</i>     | <b>1.980</b>  | 7.9E-05 | -1.105 | ns       |
| <i>SOX2</i>     | <b>1.519</b> | 7.0E-05 | -1.070 | ns       | <i>SOX2</i>     | <b>1.329</b>  | 0.04    | -1.070 | ns       |
| <i>STRN</i>     | <b>1.517</b> | 2.3E-04 | -1.007 | ns       | <i>STRN</i>     | <b>1.424</b>  | 2.6E-03 | -1.007 | ns       |
| <i>TGFB1</i>    | <b>1.952</b> | 4.9E-04 | 1.911  | 6.92E-05 | <i>TGFB1</i>    | <b>3.090</b>  | 1.4E-04 | 1.911  | ns       |
| <i>TGIF1</i>    | <b>1.665</b> | 1.0E-03 | 1.880  | 2.01E-06 | <i>TGIF1</i>    | <b>2.512</b>  | 1.6E-08 | 1.880  | 5.7E-07  |
| <i>TMEM158</i>  | <b>2.560</b> | 1.9E-04 | 1.812  | 9.46E-03 | <i>TMEM158</i>  | <b>3.010</b>  | 7.5E-05 | 1.812  | ns       |
| <i>ATP6V1C1</i> | <b>1.396</b> | 2.9E-03 | -1.222 | ns       | <i>ADAMTSL3</i> | <b>2.067</b>  | 1.7E-03 | 1.015  | ns       |
| <i>ATXN1</i>    | <b>1.533</b> | 9.0E-04 | -1.021 | ns       | <i>ARID5B</i>   | <b>1.673</b>  | 2.8E-03 | 1.145  | ns       |
| <i>CASP8</i>    | <b>1.513</b> | 8.9E-05 | 1.109  | ns       | <i>ATP11B</i>   | <b>1.902</b>  | 6.2E-03 | 1.019  | ns       |
| <i>CHFR</i>     | <b>1.454</b> | 6.3E-05 | 1.410  | 1.40E-05 | <i>BACH1</i>    | <b>1.577</b>  | 1.5E-03 | 1.050  | ns       |
| <i>DAPK1</i>    | <b>1.523</b> | 1.1E-03 | -1.200 | ns       | <i>BEND5</i>    | -1.670        | 5.4E-03 | -1.229 | ns       |
| <i>DYNC1H2</i>  | <b>1.422</b> | 3.1E-03 | 1.252  | ns       | <i>CCL2</i>     | <b>7.725</b>  | 2.2E-03 | 3.098  | ns       |
| <i>FBXO17</i>   | <b>1.872</b> | 8.6E-04 | -1.026 | ns       | <i>CDC42EP3</i> | <b>1.920</b>  | 2.8E-03 | 1.172  | ns       |
| <i>FGF9</i>     | <b>1.644</b> | 2.7E-03 | 1.109  | ns       | <i>CDK19</i>    | <b>1.598</b>  | 4.2E-03 | -1.196 | ns       |
| <i>GFPT2</i>    | <b>1.331</b> | 2.2E-03 | -1.078 | ns       | <i>CHST1</i>    | -1.226        | 9.5E-04 | 1.067  | ns       |
| <i>GPATCH2</i>  | <b>1.433</b> | 4.9E-04 | 1.031  | ns       | <i>CHSY1</i>    | <b>2.022</b>  | 8.4E-06 | 1.112  | ns       |
| <i>GSK3B</i>    | <b>1.507</b> | 4.1E-03 | -1.075 | ns       | <i>DAZL</i>     | -1.718        | 5.2E-03 | -1.614 | 6.3E-04  |
| <i>HOXA5</i>    | <b>1.462</b> | 8.3E-05 | -1.316 | 5.89E-03 | <i>DNAJC10</i>  | 1.506         | 4.7E-03 | -1.044 | ns       |
| <i>HSD17B6</i>  | <b>1.415</b> | 1.5E-03 | 1.161  | ns       | <i>ELOVL6</i>   | -1.312        | 6.5E-03 | -1.092 | ns       |
| <i>KIF13A</i>   | <b>1.436</b> | 3.7E-03 | -1.218 | ns       | <i>ERH</i>      | 1.448         | 5.9E-04 | 1.261  | 3.63E-03 |
| <i>MSRA</i>     | <b>1.434</b> | 1.8E-03 | 1.113  | ns       | <i>FAT1</i>     | <b>3.878</b>  | 2.0E-04 | 1.686  | ns       |
| <i>PHACTR1</i>  | -1.801       | 2.3E-03 | -1.260 | ns       | <i>FOXO1</i>    | <b>2.086</b>  | 1.8E-03 | 1.128  | ns       |
| <i>RAP2A</i>    | <b>2.221</b> | 2.7E-04 | 1.162  | ns       | <i>GAS1</i>     | <b>3.551</b>  | 3.4E-04 | 1.781  | ns       |

|                 |              |         |        |    |                 |              |         |        |         |
|-----------------|--------------|---------|--------|----|-----------------|--------------|---------|--------|---------|
| <i>RIT1</i>     | <b>1.334</b> | 3.2E-03 | 1.015  | ns | <i>HGSNAT</i>   | <b>1.944</b> | 1.3E-03 | 1.048  | ns      |
| <i>SLC30A10</i> | <b>1.501</b> | 3.5E-03 | -1.374 | ns | <i>IMPG2</i>    | -1.388       | 4.0E-03 | -1.199 | ns      |
| <i>SLC44A1</i>  | <b>1.914</b> | 1.8E-04 | -1.136 | ns | <i>JAM3</i>     | <b>3.226</b> | 6.7E-05 | 1.759  | ns      |
| <i>SNTB1</i>    | -1.857       | 1.4E-03 | -1.243 | ns | <i>LRRK1</i>    | <b>1.818</b> | 2.4E-03 | 1.424  | ns      |
| <i>TBC1D2</i>   | <b>3.800</b> | 4.1E-04 | -5.939 | ns | <i>MSX2</i>     | <b>1.461</b> | 3.5E-03 | 1.055  | ns      |
| <i>THAP1</i>    | <b>1.435</b> | 4.1E-03 | -1.119 | ns | <i>PAPSS1</i>   | <b>1.724</b> | 2.1E-03 | 1.013  | ns      |
| <i>TINAGL1</i>  | -1.617       | 3.1E-03 | 1.263  | ns | <i>PELI2</i>    | <b>2.346</b> | 1.1E-03 | -1.064 | ns      |
| <i>TRAK1</i>    | <b>1.412</b> | 2.4E-03 | 1.116  | ns | <i>PMP22</i>    | <b>2.077</b> | 5.7E-03 | 1.353  | ns      |
| <i>TSPAN5</i>   | -1.342       | 4.1E-03 | -1.179 | ns | <i>PNMA1</i>    | <b>2.184</b> | 1.8E-03 | 1.453  | ns      |
| <i>ZFHX3</i>    | <b>1.789</b> | 7.2E-04 | 1.017  | ns | <i>RAP1GDS1</i> | <b>1.572</b> | 4.3E-03 | -1.079 | ns      |
|                 |              |         |        |    | <i>SH3GL3</i>   | <b>1.754</b> | 2.7E-03 | -1.657 | ns      |
|                 |              |         |        |    | <i>SHOX2</i>    | <b>2.320</b> | 3.9E-04 | 1.130  | ns      |
|                 |              |         |        |    | <i>SLC38A1</i>  | <b>3.180</b> | 1.3E-05 | -1.812 | ns      |
|                 |              |         |        |    | <i>SLC7A11</i>  | <b>1.360</b> | 4.4E-03 | -1.473 | 6.1E-04 |
|                 |              |         |        |    | <i>SPON1</i>    | <b>5.373</b> | 7.8E-04 | 1.077  | ns      |
|                 |              |         |        |    | <i>TBX3</i>     | <b>2.088</b> | 1.9E-03 | -1.563 | ns      |
|                 |              |         |        |    | <i>TGFBR2</i>   | <b>2.639</b> | 6.8E-04 | 1.966  | 3.7E-03 |
|                 |              |         |        |    | <i>TMX1</i>     | <b>1.783</b> | 3.2E-03 | 1.035  | ns      |
|                 |              |         |        |    | <i>TRIM9</i>    | <b>3.543</b> | 1.1E-04 | 1.682  | ns      |
|                 |              |         |        |    | <i>VAC14</i>    | <b>1.588</b> | 1.6E-04 | -1.209 | ns      |
|                 |              |         |        |    | <i>XYLT1</i>    | <b>2.006</b> | 1.2E-03 | -1.071 | ns      |
|                 |              |         |        |    | <i>ZMIZ1</i>    | <b>2.597</b> | 1.2E-05 | 1.193  | ns      |

---



**Table S8.** Primer sequences used for RT-qPCR and ChIP-qPCR experiments.

**Mouse primers**

RT-qPCR primers

| Name     | Forward primer       | Reverse primer       |
|----------|----------------------|----------------------|
| Tk1      | CTCAGGGAAAAGCACAGAGC | CAAGGACTCCTGGGTCACAT |
| myogenin | CTACAGGCCTTGCTCAGCTC | ACGATGGACGTAAGGGAGTG |
| Cdk1     | TCAAGAGTCAGTTGGCGCCC | CACACCGCAGTTCCGGACTG |

ChIP-qPCR primer

| Name | Forward primer         | Reverse primer       |
|------|------------------------|----------------------|
| Tk1  | AGACCCCGCACCTGAATCTG   | TTCACGTAGCTGAGAGGTGG |
| Myog | GAATCACATGTAATCCACTGGA | ACGCCAACTGCTGGGTGCCA |
| Cdk1 | TCAAGAGTCAGTTGGCGCCC   | CACACCGCAGTTCCGGACTG |

**Human primers**

RT-qPCR primers

| Name  | Forward primer           | Reverse primer             |
|-------|--------------------------|----------------------------|
| SOX2  | TAGTGGTACGTTAGGCGCTT     | TCTTGCCAGTACTTGCTCTC       |
| HOXB1 | TCAGAAGGAGACGGAGGCTA     | CAGGGTGTTTCCTTGTCCTC       |
| GATA6 | TTGTGGACTCTACATGAAACTCCA | TTATGTTCTTAGGTTTTCGTTTTCTG |

ChIP-qPCR primers

| Name  | Forward primer        | Reverse primer          |
|-------|-----------------------|-------------------------|
| HOXB1 | AAGGCAGCTGGTGCTATTGT  | TCCTCCTTCCCTTCCAACCT    |
| GATA6 | GGGACAGGGATTCTTTTGTGG | TGATTCACCAGAGGTCTCAAGCC |

DamID-qPCR primers

| Name | Forward primer       | Reverse primer       |
|------|----------------------|----------------------|
| SOX2 | TGGTACGGTAGGAGCTTTGC | GCAAGAAGCCTCTCCTTGAA |
